# Supplementary material for: Reproducibility of in vivo electrophysiological measurements in mice
Source: eLife. 2025 May 12;13:RP100840. doi: 10.7554/eLife.100840 (PMC12068871; doi:10.7554/eLife.100840)
Supplement: Source data 1. [file elife-100840-data1.xlsx]

## Sheet: README
Welcome to the Quality Control spreadsheet associated with the publication "Reproducibility of in-vivo electrophysiological measurements in mice" International Brain Laboratory et al.
This spreadsheet has the following tabs:	Content of each tab:
README	(Current sheet)
All recordings (Figures)	This tab lists all the recordings performed, and whether they are used or not in each figure panel. At the bottom, you will find the N recordings used per panel. The recordings are organised by their first level of rejection criteria reached.
Potential recordings	This tab lists the potential recordings, i.e. those that are not manually rejected. It indicates whether recordings are good for analysis or failed the automated criteria. The values used to compute the criteria are given, as well as the outcome. For each potential recording, the EID date probe subject lab institute lab_number age_at_recording n_sess_before_recording information are also given. T…
Manually failed recordings	This tab lists the recordings that failed manual curation, and their reasons why.
Inclusion criteria (Figures)	What criteria are applied to include recordings for each figure panel. Default are in yellow. n/a means the criteria is not applied.

## Sheet: Inclusion criteria (Figures)
	Definition:	If the AP RMS is lower than X	If the LFP power is lower than X	If the yield is higher than X	If the subject performed minimum N trials	If minimum N channels are within a given region	If minimum N regions (passing the min_channels_region criteria) are hit	Apply only the min_regions criteria to reach "include"	If minimum N neuron (good unit) are present in a given region	If there are minimum N recordings for a given lab	If minimum N lab are present per region	Include the recording if each metric is passed	Include the lab if there is minimum N "include" recordings from this lab	Include the region if there are minimum N different "lab_include" labs in a given region	If a recording has no neurons in any of the defined 5 repeated site regions, it will not be used.
		Noise level (AP - LFP)		Yield	Behavior	Region hit			Region / Lab criteria			Inclusion levels
Figure	Panel	max_ap_rms	max_lfp_derivative	min_neurons_per_channel	n_trials	min_channels_region	min_regions	by_anatomy_only	min_neuron_region	min_rec_lab	min_lab_region	include	lab_include	permute_include	1_neuron_in_region
Default		40	1	0.1	400	5	2	FALSE	4	4	3
Figure 2	c	n/a	n/a	n/a	n/a	n/a	n/a	n/a	n/a	n/a	n/a	n/a	n/a	n/a
Figure 2	d - f	n/a	n/a	n/a	n/a	n/a	n/a	n/a	0	4	0	n/a	n/a	n/a	n/a
Figure 2	g - i	n/a	n/a	n/a	n/a	n/a	n/a	n/a	0	4	0	n/a	n/a	n/a	n/a
Figure 2 supp 1	a	n/a	n/a	n/a	n/a	n/a	n/a	n/a	n/a	n/a	n/a	n/a	n/a	n/a	n/a
Figure 3	b - c	40	1	0.1	400	5	2	FALSE	n/a	3	n/a		TRUE		n/a
Figure 3	d	40	1	0.1	400	5	3	FALSE	2	3	3			TRUE	n/a
Figure 3	e	40	1	0.1	400	5	2	FALSE	2	3	3			TRUE	n/a
Figure 3 supp 1	a - b	n/a	n/a	n/a	n/a	n/a	n/a	n/a	n/a	n/a	n/a	n/a	n/a	n/a	n/a
Figure 3 supp 2	a	40	1	0.1	400	5	3	FALSE	n/a	0	n/a		TRUE		n/a
Figure 3 supp 4		40	1	0.1	400	5	3	FALSE	2	3	3			TRUE	n/a
Figure 4	b	40	1	0.1	400	5	0	FALSE	4	0	3	TRUE			TRUE
Figure 4	c - h	40	1	0.1	400	5	0	FALSE	4	0	3			TRUE	TRUE
Figure 4 supp 1	a - f	40	1	0.1	400	5	0	FALSE	4	0	3			TRUE	TRUE
Figure 4 supp 2	a	40	1	0.1	400	5	0	FALSE	4	0	3			TRUE	TRUE
Figure 5	a - h	40	1	0.1	400	5	0	FALSE	4	4	3			TRUE	TRUE
Figure 5 supp 1	a - o	40	1	0.1	400	5	0	FALSE	4	4	3			TRUE	TRUE
Figure 6	a - d	40	1	0.1	400	5	0	FALSE	4	0	0	TRUE			TRUE
Figure 6 supp1	a - d	40	1	0.1	400	5	0	FALSE	4	0	0	TRUE			TRUE
Figure 6 supp2	a - d	40	1	0.1	400	5	0	FALSE	4	0	0	TRUE			TRUE
Figure 6 supp 3	a - d	40	1	0.1	400	5	0	FALSE	4	0	0	TRUE			TRUE
Figure 6 supp 4	a-e	40	1	0.1	400	5	0	FALSE	4	0	0	TRUE			TRUE
Figure 6 supp 5	a	40	1	0.1	400	5	0	FALSE	4	0	0	TRUE			TRUE
Figure 7	a - c	40	1	0.1	400	5	0	FALSE	4	4	3			TRUE	TRUE
Figure 9	a - b	40	1	0.1	400	5	0	FALSE	4	4	3			TRUE	TRUE

## Sheet: All recordings (Figures)
Exclusion reason		Probe identifier (PID)	Lab	fig 1 - panel d	fig 1 - panel e	fig 1 - panel f	fig 1 supp 2	fig 1 supp 3 - panel a	fig 1 supp 3 - panel b	fig 1 supp 4	fig 1 supp 5	fig 2 - panel c	fig 2 - panel d	fig 2 - panel e	fig 2 - panel f	fig 2 - panel g	fig 2 - panel h	fig 2 - panel i	fig 3 - panel b	fig 3 - panel c	fig 3 - panel d	fig 3 - panel e	fig 3 supp 1	fig 3 supp 2	fig 3 supp 4	fig 4 - panel a	fig 4 - panel b	fig 4 - panel c LP	fig 4 - panel d CA1	fig 4 - panel d DG	fig 4 - panel d PO	fig 4 - panel d PPC	fig 4 - panel e	fig 4 - panel g	fig 4 - panel h	fig 4 supp 1	fig 4 supp 2	fig 5	fig 5 supp 1	fig 6	fig 6 supp 1	fig 6 supp 2	fig 6 supp 3 - panels a-b	fig 6 supp 3 panels c-d	fig 6 supp 4	fig 6 supp 5	fig 7	fig 8	fig 8 supp 1
GOOD FOR ANALYSIS		0b8ea3ec-e75b-41a1-9442-64f5fbc11a5a	mainenlab	TRUE	FALSE	TRUE	FALSE	FALSE	FALSE	TRUE	TRUE	TRUE	TRUE	TRUE	TRUE	TRUE	TRUE	TRUE	TRUE	TRUE	TRUE	TRUE	TRUE	TRUE	TRUE	FALSE	FALSE	TRUE	FALSE	TRUE	TRUE	TRUE	TRUE	TRUE	TRUE	TRUE	TRUE	TRUE	TRUE	TRUE	TRUE	TRUE	TRUE	TRUE	TRUE	TRUE	TRUE	TRUE	TRUE
		e42e948c-3154-45cb-bf52-408b7cda0f2f	churchlandlab_ucla	TRUE	FALSE	TRUE	FALSE	FALSE	FALSE	TRUE	TRUE	TRUE	TRUE	TRUE	TRUE	TRUE	TRUE	TRUE	TRUE	TRUE	TRUE	TRUE	TRUE	TRUE	TRUE	FALSE	FALSE	FALSE	TRUE	FALSE	FALSE	FALSE	TRUE	TRUE	TRUE	TRUE	TRUE	TRUE	TRUE	FALSE	FALSE	TRUE	TRUE	FALSE	TRUE	TRUE	TRUE	FALSE	FALSE
		ce397420-3cd2-4a55-8fd1-5e28321981f4	mrsicflogellab	TRUE	FALSE	TRUE	FALSE	FALSE	FALSE	TRUE	TRUE	TRUE	TRUE	TRUE	TRUE	TRUE	TRUE	TRUE	TRUE	TRUE	TRUE	TRUE	TRUE	TRUE	TRUE	FALSE	FALSE	TRUE	TRUE	TRUE	TRUE	TRUE	TRUE	TRUE	TRUE	TRUE	TRUE	TRUE	TRUE	TRUE	TRUE	TRUE	TRUE	TRUE	TRUE	TRUE	TRUE	TRUE	TRUE
		e4ce2e94-6fb9-4afe-acbf-6f5a3498602e	hausserlab	TRUE	FALSE	TRUE	FALSE	FALSE	FALSE	TRUE	TRUE	TRUE	FALSE	FALSE	FALSE	FALSE	FALSE	FALSE	FALSE	FALSE	FALSE	FALSE	TRUE	FALSE	FALSE	FALSE	FALSE	FALSE	FALSE	FALSE	FALSE	FALSE	FALSE	FALSE	FALSE	FALSE	FALSE	FALSE	FALSE	FALSE	FALSE	FALSE	FALSE	FALSE	FALSE	FALSE	FALSE	FALSE	FALSE
		b83407f8-8220-46f9-9b90-a4c9f150c572	churchlandlab_ucla	TRUE	FALSE	TRUE	FALSE	FALSE	FALSE	TRUE	TRUE	TRUE	TRUE	TRUE	TRUE	TRUE	TRUE	TRUE	FALSE	FALSE	FALSE	FALSE	TRUE	FALSE	FALSE	FALSE	FALSE	FALSE	FALSE	FALSE	FALSE	FALSE	FALSE	FALSE	FALSE	FALSE	FALSE	FALSE	FALSE	FALSE	FALSE	FALSE	FALSE	FALSE	FALSE	FALSE	FALSE	FALSE	FALSE
		92822789-608f-44a6-ad64-fe549402b2df	churchlandlab_ucla	TRUE	FALSE	TRUE	FALSE	FALSE	FALSE	TRUE	TRUE	TRUE	TRUE	TRUE	TRUE	TRUE	TRUE	TRUE	FALSE	FALSE	FALSE	FALSE	TRUE	FALSE	FALSE	FALSE	FALSE	FALSE	FALSE	FALSE	FALSE	FALSE	FALSE	FALSE	FALSE	FALSE	FALSE	FALSE	FALSE	FALSE	FALSE	FALSE	FALSE	FALSE	FALSE	FALSE	FALSE	FALSE	FALSE
		f4bd76a6-66c9-41f3-9311-6962315f8fc8	mainenlab	TRUE	FALSE	TRUE	FALSE	FALSE	FALSE	TRUE	TRUE	TRUE	TRUE	TRUE	TRUE	TRUE	TRUE	TRUE	TRUE	TRUE	TRUE	TRUE	TRUE	TRUE	TRUE	FALSE	FALSE	TRUE	FALSE	TRUE	TRUE	FALSE	TRUE	TRUE	TRUE	TRUE	TRUE	TRUE	TRUE	TRUE	TRUE	TRUE	TRUE	TRUE	TRUE	TRUE	TRUE	TRUE	TRUE
		3d3d5a5e-df26-43ee-80b6-2d72d85668a5	churchlandlab_ucla	TRUE	FALSE	TRUE	FALSE	FALSE	FALSE	TRUE	TRUE	TRUE	TRUE	TRUE	TRUE	TRUE	TRUE	TRUE	TRUE	TRUE	TRUE	TRUE	TRUE	TRUE	TRUE	FALSE	FALSE	TRUE	TRUE	TRUE	FALSE	FALSE	TRUE	TRUE	TRUE	TRUE	TRUE	TRUE	TRUE	TRUE	FALSE	TRUE	TRUE	FALSE	TRUE	TRUE	FALSE	FALSE	FALSE
		e31b4e39-e350-47a9-aca4-72496d99ff2a	mainenlab	TRUE	FALSE	TRUE	FALSE	FALSE	FALSE	TRUE	TRUE	TRUE	TRUE	TRUE	TRUE	TRUE	TRUE	TRUE	TRUE	TRUE	TRUE	TRUE	TRUE	TRUE	TRUE	FALSE	FALSE	TRUE	TRUE	TRUE	TRUE	FALSE	TRUE	TRUE	TRUE	TRUE	TRUE	TRUE	TRUE	TRUE	FALSE	TRUE	TRUE	TRUE	TRUE	TRUE	TRUE	FALSE	FALSE
		6fc4d73c-2071-43ec-a756-c6c6d8322c8b	hoferlab	TRUE	FALSE	TRUE	FALSE	FALSE	FALSE	TRUE	TRUE	TRUE	TRUE	TRUE	TRUE	TRUE	TRUE	TRUE	TRUE	TRUE	TRUE	TRUE	TRUE	TRUE	TRUE	FALSE	FALSE	TRUE	FALSE	TRUE	TRUE	FALSE	TRUE	TRUE	TRUE	TRUE	TRUE	TRUE	TRUE	TRUE	FALSE	FALSE	TRUE	TRUE	TRUE	TRUE	TRUE	TRUE	TRUE
		4836a465-c691-4852-a0b1-dcd2b1ce38a1	steinmetzlab	TRUE	FALSE	TRUE	FALSE	FALSE	FALSE	TRUE	TRUE	TRUE	FALSE	FALSE	TRUE	FALSE	FALSE	TRUE	FALSE	FALSE	FALSE	FALSE	TRUE	FALSE	FALSE	FALSE	FALSE	FALSE	FALSE	FALSE	FALSE	FALSE	FALSE	FALSE	FALSE	FALSE	FALSE	FALSE	FALSE	FALSE	FALSE	FALSE	FALSE	FALSE	FALSE	FALSE	FALSE	FALSE	FALSE
		1e176f17-d00f-49bb-87ff-26d237b525f1	angelakilab	TRUE	FALSE	TRUE	FALSE	FALSE	FALSE	TRUE	TRUE	TRUE	FALSE	TRUE	TRUE	FALSE	TRUE	TRUE	TRUE	TRUE	TRUE	TRUE	TRUE	TRUE	TRUE	FALSE	FALSE	FALSE	TRUE	TRUE	FALSE	TRUE	TRUE	TRUE	TRUE	TRUE	TRUE	TRUE	TRUE	TRUE	TRUE	TRUE	TRUE	TRUE	TRUE	TRUE	TRUE	TRUE	TRUE
		92033a0c-5a14-471b-b131-d43c72ca5d7a	steinmetzlab	TRUE	FALSE	TRUE	FALSE	FALSE	FALSE	TRUE	TRUE	TRUE	TRUE	TRUE	TRUE	TRUE	TRUE	TRUE	TRUE	TRUE	TRUE	TRUE	TRUE	TRUE	TRUE	FALSE	FALSE	FALSE	FALSE	FALSE	FALSE	TRUE	TRUE	TRUE	TRUE	TRUE	TRUE	TRUE	TRUE	TRUE	TRUE	TRUE	TRUE	FALSE	TRUE	TRUE	TRUE	TRUE	TRUE
		16799c7a-e395-435d-a4c4-a678007e1550	cortexlab	TRUE	FALSE	TRUE	FALSE	FALSE	FALSE	TRUE	TRUE	TRUE	TRUE	TRUE	TRUE	TRUE	TRUE	TRUE	TRUE	TRUE	TRUE	TRUE	TRUE	TRUE	TRUE	FALSE	FALSE	TRUE	FALSE	TRUE	FALSE	TRUE	TRUE	TRUE	TRUE	TRUE	TRUE	TRUE	TRUE	TRUE	TRUE	TRUE	TRUE	FALSE	TRUE	TRUE	TRUE	FALSE	FALSE
		b25799a5-09e8-4656-9c1b-44bc9cbb5279	wittenlab	TRUE	FALSE	TRUE	FALSE	FALSE	FALSE	TRUE	TRUE	TRUE	TRUE	TRUE	TRUE	TRUE	TRUE	TRUE	TRUE	TRUE	TRUE	TRUE	TRUE	TRUE	TRUE	FALSE	FALSE	TRUE	TRUE	FALSE	TRUE	TRUE	TRUE	TRUE	TRUE	TRUE	TRUE	TRUE	TRUE	TRUE	TRUE	TRUE	TRUE	TRUE	TRUE	TRUE	TRUE	FALSE	FALSE
		c17772a9-21b5-49df-ab31-3017addea12e	hoferlab	TRUE	FALSE	TRUE	FALSE	FALSE	FALSE	TRUE	TRUE	TRUE	TRUE	TRUE	TRUE	TRUE	TRUE	TRUE	TRUE	TRUE	TRUE	TRUE	TRUE	TRUE	TRUE	FALSE	FALSE	TRUE	TRUE	FALSE	TRUE	FALSE	TRUE	TRUE	TRUE	TRUE	TRUE	TRUE	TRUE	TRUE	FALSE	TRUE	TRUE	TRUE	TRUE	TRUE	TRUE	TRUE	TRUE
		22212d26-a167-45fb-9963-35ecd003e8a2	cortexlab	TRUE	FALSE	TRUE	FALSE	FALSE	FALSE	TRUE	TRUE	TRUE	TRUE	TRUE	TRUE	TRUE	TRUE	TRUE	TRUE	TRUE	TRUE	TRUE	TRUE	TRUE	TRUE	FALSE	FALSE	TRUE	FALSE	TRUE	TRUE	TRUE	TRUE	TRUE	TRUE	TRUE	TRUE	TRUE	TRUE	TRUE	TRUE	TRUE	TRUE	TRUE	TRUE	TRUE	TRUE	FALSE	FALSE
		0851db85-2889-4070-ac18-a40e8ebd96ba	wittenlab	TRUE	FALSE	TRUE	FALSE	FALSE	FALSE	TRUE	TRUE	TRUE	TRUE	TRUE	TRUE	TRUE	TRUE	TRUE	TRUE	TRUE	TRUE	TRUE	TRUE	TRUE	TRUE	FALSE	FALSE	FALSE	FALSE	FALSE	FALSE	TRUE	TRUE	TRUE	TRUE	TRUE	TRUE	TRUE	TRUE	FALSE	TRUE	TRUE	TRUE	FALSE	TRUE	TRUE	TRUE	FALSE	FALSE
		eeb27b45-5b85-4e5c-b6ff-f639ca5687de	churchlandlab	TRUE	FALSE	TRUE	TRUE	FALSE	FALSE	TRUE	TRUE	TRUE	TRUE	TRUE	TRUE	TRUE	TRUE	TRUE	TRUE	TRUE	TRUE	TRUE	TRUE	TRUE	TRUE	FALSE	FALSE	TRUE	TRUE	FALSE	FALSE	TRUE	TRUE	TRUE	TRUE	TRUE	TRUE	TRUE	TRUE	TRUE	TRUE	TRUE	TRUE	TRUE	TRUE	TRUE	TRUE	TRUE	TRUE
		69f42a9c-095d-4a25-bca8-61a9869871d3	churchlandlab	TRUE	FALSE	TRUE	FALSE	FALSE	FALSE	TRUE	TRUE	TRUE	TRUE	TRUE	TRUE	TRUE	TRUE	TRUE	TRUE	TRUE	TRUE	TRUE	TRUE	TRUE	TRUE	FALSE	FALSE	TRUE	TRUE	TRUE	FALSE	TRUE	TRUE	TRUE	TRUE	TRUE	TRUE	TRUE	TRUE	TRUE	TRUE	TRUE	TRUE	FALSE	TRUE	TRUE	TRUE	TRUE	TRUE
		8c732bf2-639d-496c-bf82-464bc9c2d54b	churchlandlab_ucla	TRUE	FALSE	TRUE	FALSE	FALSE	FALSE	TRUE	TRUE	TRUE	TRUE	TRUE	TRUE	TRUE	TRUE	TRUE	TRUE	TRUE	TRUE	TRUE	TRUE	TRUE	TRUE	FALSE	FALSE	TRUE	TRUE	FALSE	TRUE	FALSE	TRUE	TRUE	TRUE	TRUE	TRUE	TRUE	TRUE	TRUE	FALSE	TRUE	FALSE	TRUE	TRUE	TRUE	TRUE	TRUE	TRUE
		f03b61b4-6b13-479d-940f-d1608eb275cc	mainenlab	TRUE	FALSE	FALSE	TRUE	FALSE	FALSE	FALSE	FALSE	TRUE	TRUE	TRUE	TRUE	TRUE	TRUE	TRUE	TRUE	TRUE	TRUE	TRUE	TRUE	TRUE	TRUE	FALSE	FALSE	TRUE	TRUE	TRUE	TRUE	TRUE	TRUE	TRUE	TRUE	TRUE	TRUE	TRUE	TRUE	TRUE	TRUE	TRUE	TRUE	TRUE	TRUE	TRUE	TRUE	FALSE	FALSE
		478de1ce-d7e7-4221-9365-2abdc6e88fb6	steinmetzlab	TRUE	FALSE	FALSE	FALSE	FALSE	FALSE	FALSE	FALSE	TRUE	TRUE	TRUE	TRUE	TRUE	TRUE	TRUE	FALSE	FALSE	FALSE	FALSE	TRUE	FALSE	FALSE	FALSE	FALSE	FALSE	FALSE	FALSE	FALSE	FALSE	FALSE	FALSE	FALSE	FALSE	FALSE	FALSE	FALSE	FALSE	FALSE	FALSE	FALSE	FALSE	FALSE	FALSE	FALSE	FALSE	FALSE
		f86e9571-63ff-4116-9c40-aa44d57d2da9	churchlandlab	TRUE	FALSE	TRUE	FALSE	FALSE	FALSE	TRUE	TRUE	TRUE	TRUE	TRUE	TRUE	TRUE	TRUE	TRUE	TRUE	TRUE	TRUE	TRUE	TRUE	TRUE	TRUE	FALSE	FALSE	FALSE	FALSE	TRUE	FALSE	TRUE	TRUE	TRUE	TRUE	TRUE	TRUE	TRUE	TRUE	TRUE	TRUE	TRUE	TRUE	FALSE	TRUE	TRUE	TRUE	TRUE	TRUE
		31f3e083-a324-4b88-b0a4-7788ec37b191	angelakilab	TRUE	FALSE	TRUE	FALSE	FALSE	FALSE	TRUE	TRUE	TRUE	TRUE	TRUE	TRUE	TRUE	TRUE	TRUE	TRUE	TRUE	TRUE	TRUE	TRUE	TRUE	TRUE	FALSE	FALSE	TRUE	TRUE	TRUE	TRUE	TRUE	TRUE	TRUE	TRUE	TRUE	TRUE	TRUE	TRUE	TRUE	TRUE	TRUE	TRUE	TRUE	TRUE	TRUE	TRUE	TRUE	TRUE
		f2ee886d-5b9c-4d06-a9be-ee7ae8381114	churchlandlab	TRUE	FALSE	TRUE	FALSE	FALSE	FALSE	TRUE	TRUE	TRUE	TRUE	TRUE	TRUE	TRUE	TRUE	TRUE	TRUE	TRUE	TRUE	TRUE	TRUE	TRUE	TRUE	FALSE	FALSE	FALSE	TRUE	TRUE	FALSE	TRUE	TRUE	TRUE	TRUE	TRUE	TRUE	TRUE	TRUE	FALSE	TRUE	TRUE	TRUE	FALSE	TRUE	TRUE	TRUE	FALSE	FALSE
		f26a6ab1-7e37-4f8d-bb50-295c056e1062	danlab	TRUE	FALSE	TRUE	FALSE	FALSE	FALSE	TRUE	TRUE	TRUE	FALSE	TRUE	TRUE	FALSE	TRUE	TRUE	TRUE	TRUE	TRUE	TRUE	TRUE	TRUE	TRUE	TRUE	TRUE	TRUE	FALSE	FALSE	FALSE	TRUE	TRUE	TRUE	TRUE	TRUE	TRUE	TRUE	TRUE	TRUE	TRUE	TRUE	TRUE	FALSE	TRUE	TRUE	TRUE	TRUE	TRUE
		f2a098e7-a67e-4125-92d8-36fc6b606c45	cortexlab	TRUE	FALSE	TRUE	FALSE	FALSE	FALSE	TRUE	TRUE	TRUE	TRUE	TRUE	TRUE	TRUE	TRUE	TRUE	TRUE	TRUE	TRUE	TRUE	TRUE	TRUE	TRUE	FALSE	FALSE	FALSE	TRUE	TRUE	FALSE	TRUE	TRUE	TRUE	TRUE	TRUE	TRUE	TRUE	TRUE	FALSE	TRUE	TRUE	TRUE	FALSE	TRUE	TRUE	TRUE	FALSE	FALSE
		c4f6665f-8be5-476b-a6e8-d81eeae9279d	danlab	TRUE	FALSE	TRUE	TRUE	FALSE	FALSE	TRUE	TRUE	TRUE	FALSE	TRUE	TRUE	FALSE	TRUE	TRUE	TRUE	TRUE	TRUE	TRUE	TRUE	TRUE	TRUE	FALSE	FALSE	FALSE	TRUE	FALSE	FALSE	FALSE	TRUE	TRUE	TRUE	TRUE	TRUE	TRUE	TRUE	FALSE	FALSE	TRUE	FALSE	FALSE	TRUE	TRUE	FALSE	FALSE	FALSE
		57656bee-e32e-4848-b924-0f6f18cfdfb1	zadorlab	TRUE	FALSE	TRUE	TRUE	FALSE	FALSE	TRUE	TRUE	TRUE	TRUE	TRUE	TRUE	TRUE	TRUE	TRUE	TRUE	TRUE	TRUE	TRUE	TRUE	TRUE	TRUE	FALSE	FALSE	FALSE	TRUE	FALSE	FALSE	FALSE	TRUE	TRUE	TRUE	TRUE	TRUE	TRUE	TRUE	FALSE	TRUE	TRUE	FALSE	FALSE	TRUE	TRUE	FALSE	FALSE	FALSE
		1a60a6e1-da99-4d4e-a734-39b1d4544fad	angelakilab	TRUE	TRUE	TRUE	FALSE	FALSE	FALSE	TRUE	TRUE	TRUE	TRUE	TRUE	TRUE	TRUE	TRUE	TRUE	TRUE	TRUE	TRUE	TRUE	TRUE	TRUE	TRUE	FALSE	FALSE	TRUE	TRUE	TRUE	TRUE	TRUE	TRUE	TRUE	TRUE	TRUE	TRUE	TRUE	TRUE	TRUE	TRUE	TRUE	TRUE	TRUE	TRUE	TRUE	TRUE	TRUE	TRUE
		27bac116-ea57-4512-ad35-714a62d259cd	churchlandlab_ucla	TRUE	FALSE	TRUE	FALSE	FALSE	FALSE	TRUE	TRUE	TRUE	TRUE	TRUE	TRUE	TRUE	TRUE	TRUE	TRUE	TRUE	TRUE	TRUE	TRUE	TRUE	TRUE	FALSE	FALSE	FALSE	TRUE	FALSE	FALSE	FALSE	TRUE	TRUE	TRUE	TRUE	TRUE	TRUE	TRUE	FALSE	FALSE	TRUE	TRUE	FALSE	TRUE	TRUE	TRUE	FALSE	FALSE
		7d999a68-0215-4e45-8e6c-879c6ca2b771	mainenlab	TRUE	FALSE	TRUE	FALSE	FALSE	FALSE	TRUE	TRUE	TRUE	TRUE	TRUE	TRUE	TRUE	TRUE	TRUE	TRUE	TRUE	TRUE	TRUE	TRUE	TRUE	TRUE	FALSE	FALSE	TRUE	FALSE	FALSE	TRUE	FALSE	TRUE	TRUE	TRUE	TRUE	TRUE	TRUE	TRUE	TRUE	TRUE	TRUE	TRUE	TRUE	TRUE	TRUE	TRUE	FALSE	FALSE
		9117969a-3f0d-478b-ad75-98263e3bfacf	danlab	TRUE	FALSE	TRUE	FALSE	FALSE	FALSE	TRUE	TRUE	TRUE	FALSE	TRUE	TRUE	FALSE	TRUE	TRUE	TRUE	TRUE	TRUE	TRUE	TRUE	TRUE	TRUE	FALSE	FALSE	TRUE	TRUE	TRUE	FALSE	TRUE	TRUE	TRUE	TRUE	TRUE	TRUE	TRUE	TRUE	TRUE	TRUE	TRUE	TRUE	TRUE	TRUE	TRUE	TRUE	TRUE	TRUE
		6b6af675-e1ef-43a6-b408-95cfc71fe2cc	cortexlab	TRUE	FALSE	TRUE	FALSE	FALSE	FALSE	TRUE	TRUE	TRUE	TRUE	TRUE	TRUE	TRUE	TRUE	TRUE	TRUE	TRUE	TRUE	TRUE	TRUE	TRUE	TRUE	FALSE	FALSE	FALSE	TRUE	FALSE	TRUE	FALSE	TRUE	TRUE	TRUE	TRUE	TRUE	TRUE	TRUE	FALSE	FALSE	TRUE	FALSE	TRUE	TRUE	TRUE	TRUE	TRUE	TRUE
		febb430e-2d50-4f83-87a0-b5ffbb9a4943	danlab	TRUE	FALSE	TRUE	FALSE	FALSE	FALSE	TRUE	TRUE	TRUE	FALSE	TRUE	TRUE	FALSE	TRUE	TRUE	TRUE	TRUE	TRUE	TRUE	TRUE	TRUE	TRUE	FALSE	FALSE	TRUE	TRUE	TRUE	FALSE	FALSE	TRUE	TRUE	TRUE	TRUE	TRUE	TRUE	TRUE	TRUE	FALSE	TRUE	TRUE	FALSE	TRUE	TRUE	TRUE	TRUE	TRUE
		ad714133-1e03-4d3a-8427-33fc483daf1a	cortexlab	TRUE	FALSE	TRUE	FALSE	FALSE	FALSE	TRUE	TRUE	TRUE	TRUE	TRUE	TRUE	TRUE	TRUE	TRUE	TRUE	TRUE	TRUE	TRUE	TRUE	TRUE	TRUE	FALSE	FALSE	TRUE	TRUE	TRUE	TRUE	TRUE	TRUE	TRUE	TRUE	TRUE	TRUE	TRUE	TRUE	TRUE	TRUE	TRUE	TRUE	TRUE	TRUE	TRUE	TRUE	TRUE	TRUE
		d004f105-9886-4b83-a59a-f9173131a383	steinmetzlab	TRUE	FALSE	FALSE	FALSE	FALSE	FALSE	FALSE	FALSE	TRUE	FALSE	TRUE	TRUE	FALSE	TRUE	TRUE	TRUE	TRUE	TRUE	TRUE	TRUE	TRUE	TRUE	FALSE	FALSE	FALSE	TRUE	FALSE	FALSE	TRUE	TRUE	TRUE	TRUE	TRUE	TRUE	TRUE	TRUE	FALSE	TRUE	TRUE	TRUE	FALSE	TRUE	TRUE	TRUE	TRUE	TRUE
		4b93a168-0f3b-4124-88fa-a57046ca70e1	mrsicflogellab	TRUE	FALSE	TRUE	TRUE	FALSE	FALSE	TRUE	TRUE	TRUE	TRUE	TRUE	TRUE	TRUE	TRUE	TRUE	TRUE	TRUE	TRUE	TRUE	TRUE	TRUE	TRUE	FALSE	FALSE	TRUE	FALSE	TRUE	FALSE	FALSE	TRUE	TRUE	TRUE	TRUE	TRUE	TRUE	TRUE	TRUE	FALSE	TRUE	TRUE	FALSE	TRUE	TRUE	TRUE	FALSE	FALSE
		bc1602ba-dd6c-4ae4-bcb2-4925e7c8632a	mainenlab	TRUE	FALSE	TRUE	FALSE	FALSE	FALSE	TRUE	TRUE	TRUE	TRUE	TRUE	TRUE	TRUE	TRUE	TRUE	TRUE	TRUE	TRUE	TRUE	TRUE	TRUE	TRUE	FALSE	FALSE	FALSE	TRUE	FALSE	TRUE	TRUE	TRUE	TRUE	TRUE	TRUE	TRUE	TRUE	TRUE	FALSE	TRUE	TRUE	FALSE	TRUE	TRUE	TRUE	TRUE	FALSE	FALSE
		7cbecb3f-6a8a-48e5-a3be-8f7a762b5a04	angelakilab	TRUE	FALSE	TRUE	TRUE	FALSE	FALSE	TRUE	TRUE	TRUE	TRUE	TRUE	TRUE	TRUE	TRUE	TRUE	TRUE	TRUE	TRUE	TRUE	TRUE	TRUE	TRUE	FALSE	FALSE	FALSE	TRUE	TRUE	FALSE	FALSE	TRUE	TRUE	TRUE	TRUE	TRUE	TRUE	TRUE	FALSE	FALSE	TRUE	TRUE	FALSE	TRUE	TRUE	TRUE	FALSE	FALSE
		17d9710a-f292-4226-b033-687d54b6545a	cortexlab	TRUE	FALSE	TRUE	FALSE	FALSE	FALSE	TRUE	TRUE	TRUE	TRUE	TRUE	TRUE	TRUE	TRUE	TRUE	TRUE	TRUE	TRUE	TRUE	TRUE	TRUE	TRUE	FALSE	FALSE	TRUE	FALSE	TRUE	TRUE	FALSE	TRUE	TRUE	TRUE	TRUE	TRUE	TRUE	TRUE	TRUE	TRUE	TRUE	TRUE	TRUE	TRUE	TRUE	TRUE	TRUE	TRUE
		c07d13ed-e387-4457-8e33-1d16aed3fd92	churchlandlab_ucla	TRUE	FALSE	TRUE	TRUE	FALSE	FALSE	TRUE	TRUE	TRUE	TRUE	TRUE	TRUE	TRUE	TRUE	TRUE	TRUE	TRUE	TRUE	TRUE	TRUE	TRUE	TRUE	FALSE	FALSE	TRUE	FALSE	TRUE	TRUE	FALSE	TRUE	TRUE	TRUE	TRUE	TRUE	TRUE	TRUE	TRUE	TRUE	TRUE	TRUE	TRUE	TRUE	TRUE	TRUE	TRUE	TRUE
		a8a59fc3-a658-4db4-b5e8-09f1e4df03fd	churchlandlab_ucla	TRUE	FALSE	TRUE	FALSE	FALSE	FALSE	TRUE	TRUE	TRUE	TRUE	TRUE	TRUE	TRUE	TRUE	TRUE	TRUE	TRUE	TRUE	TRUE	TRUE	TRUE	TRUE	FALSE	FALSE	FALSE	TRUE	TRUE	FALSE	FALSE	TRUE	TRUE	TRUE	TRUE	TRUE	TRUE	TRUE	FALSE	FALSE	TRUE	TRUE	FALSE	TRUE	TRUE	TRUE	FALSE	FALSE
		8b7c808f-763b-44c8-b273-63c6afbc6aae	mrsicflogellab	TRUE	FALSE	FALSE	FALSE	FALSE	FALSE	FALSE	FALSE	TRUE	TRUE	TRUE	TRUE	TRUE	TRUE	TRUE	TRUE	TRUE	TRUE	TRUE	TRUE	TRUE	TRUE	FALSE	FALSE	FALSE	TRUE	TRUE	FALSE	TRUE	TRUE	TRUE	TRUE	TRUE	TRUE	TRUE	TRUE	FALSE	TRUE	TRUE	TRUE	FALSE	TRUE	TRUE	TRUE	FALSE	FALSE
		e49f221d-399d-4297-bb7d-2d23cc0e4acc	cortexlab	TRUE	FALSE	TRUE	FALSE	FALSE	FALSE	TRUE	TRUE	TRUE	TRUE	TRUE	TRUE	TRUE	TRUE	TRUE	TRUE	TRUE	TRUE	TRUE	TRUE	TRUE	TRUE	FALSE	FALSE	TRUE	FALSE	TRUE	TRUE	FALSE	TRUE	TRUE	TRUE	TRUE	TRUE	TRUE	TRUE	TRUE	TRUE	TRUE	TRUE	TRUE	TRUE	TRUE	TRUE	TRUE	TRUE
		80f6ffdd-f692-450f-ab19-cd6d45bfd73e	churchlandlab_ucla	TRUE	FALSE	TRUE	FALSE	FALSE	FALSE	TRUE	TRUE	TRUE	TRUE	TRUE	TRUE	TRUE	TRUE	TRUE	TRUE	TRUE	TRUE	TRUE	TRUE	TRUE	TRUE	FALSE	FALSE	TRUE	TRUE	TRUE	FALSE	TRUE	TRUE	TRUE	TRUE	TRUE	TRUE	TRUE	TRUE	TRUE	TRUE	TRUE	TRUE	FALSE	TRUE	TRUE	TRUE	FALSE	FALSE
		63517fd4-ece1-49eb-9259-371dc30b1dd6	danlab	TRUE	FALSE	TRUE	TRUE	TRUE	FALSE	TRUE	TRUE	TRUE	FALSE	TRUE	TRUE	FALSE	TRUE	TRUE	TRUE	TRUE	TRUE	TRUE	TRUE	TRUE	TRUE	FALSE	FALSE	FALSE	TRUE	FALSE	FALSE	TRUE	TRUE	TRUE	TRUE	TRUE	TRUE	TRUE	TRUE	FALSE	TRUE	TRUE	FALSE	FALSE	TRUE	TRUE	TRUE	FALSE	FALSE
		f93bfce4-e814-4ae3-9cdf-59f4dcdedf51	angelakilab	TRUE	FALSE	TRUE	FALSE	FALSE	FALSE	TRUE	TRUE	TRUE	TRUE	TRUE	TRUE	TRUE	TRUE	TRUE	TRUE	TRUE	TRUE	TRUE	TRUE	TRUE	TRUE	FALSE	FALSE	TRUE	TRUE	TRUE	FALSE	FALSE	TRUE	TRUE	TRUE	TRUE	TRUE	TRUE	TRUE	TRUE	FALSE	TRUE	TRUE	FALSE	TRUE	TRUE	TRUE	FALSE	FALSE
		8ca1a850-26ef-42be-8b28-c2e2d12f06d6	zadorlab	TRUE	FALSE	TRUE	TRUE	FALSE	FALSE	TRUE	TRUE	TRUE	TRUE	TRUE	TRUE	TRUE	TRUE	TRUE	TRUE	TRUE	TRUE	TRUE	TRUE	TRUE	TRUE	FALSE	FALSE	FALSE	TRUE	FALSE	FALSE	FALSE	TRUE	TRUE	TRUE	TRUE	TRUE	TRUE	TRUE	FALSE	FALSE	TRUE	FALSE	TRUE	TRUE	TRUE	TRUE	FALSE	FALSE
		70da415f-444d-4148-ade7-a1f58a16fcf8	cortexlab	TRUE	FALSE	TRUE	FALSE	FALSE	FALSE	TRUE	TRUE	TRUE	TRUE	TRUE	TRUE	TRUE	TRUE	TRUE	TRUE	TRUE	TRUE	TRUE	TRUE	TRUE	TRUE	FALSE	FALSE	TRUE	TRUE	FALSE	FALSE	TRUE	TRUE	TRUE	TRUE	TRUE	TRUE	TRUE	TRUE	TRUE	TRUE	TRUE	TRUE	FALSE	TRUE	TRUE	TRUE	FALSE	FALSE
		6e1379e8-3af0-4fc5-8ba8-37d3bb02226b	angelakilab	TRUE	FALSE	TRUE	FALSE	FALSE	FALSE	TRUE	TRUE	TRUE	TRUE	TRUE	TRUE	TRUE	TRUE	TRUE	TRUE	TRUE	TRUE	TRUE	TRUE	TRUE	TRUE	FALSE	FALSE	TRUE	TRUE	TRUE	TRUE	TRUE	TRUE	TRUE	TRUE	TRUE	TRUE	TRUE	TRUE	TRUE	TRUE	TRUE	TRUE	TRUE	TRUE	TRUE	TRUE	FALSE	FALSE
		8d59da25-3a9c-44be-8b1a-e27cdd39ca34	churchlandlab	TRUE	FALSE	TRUE	FALSE	FALSE	FALSE	TRUE	TRUE	TRUE	TRUE	TRUE	TRUE	TRUE	TRUE	TRUE	TRUE	TRUE	TRUE	TRUE	TRUE	TRUE	TRUE	FALSE	FALSE	TRUE	TRUE	FALSE	FALSE	FALSE	TRUE	TRUE	TRUE	TRUE	TRUE	TRUE	TRUE	TRUE	FALSE	TRUE	TRUE	TRUE	TRUE	TRUE	TRUE	TRUE	TRUE
		bf96f6d6-4726-4cfa-804a-bca8f9262721	angelakilab	TRUE	FALSE	TRUE	FALSE	FALSE	FALSE	TRUE	TRUE	TRUE	TRUE	TRUE	TRUE	TRUE	TRUE	TRUE	TRUE	TRUE	TRUE	TRUE	TRUE	TRUE	TRUE	FALSE	FALSE	TRUE	FALSE	TRUE	FALSE	FALSE	TRUE	TRUE	TRUE	TRUE	TRUE	TRUE	TRUE	TRUE	FALSE	FALSE	TRUE	FALSE	TRUE	TRUE	TRUE	TRUE	TRUE
		f68d9f26-ac40-4c67-9cbf-9ad1851292f7	churchlandlab_ucla	TRUE	FALSE	TRUE	FALSE	FALSE	FALSE	TRUE	TRUE	TRUE	TRUE	TRUE	TRUE	TRUE	TRUE	TRUE	TRUE	TRUE	TRUE	TRUE	TRUE	TRUE	TRUE	FALSE	FALSE	FALSE	TRUE	TRUE	FALSE	TRUE	TRUE	TRUE	TRUE	TRUE	TRUE	TRUE	TRUE	FALSE	TRUE	TRUE	TRUE	FALSE	TRUE	TRUE	TRUE	FALSE	FALSE
		a3d13b05-bf4d-427a-a2d5-2fe050d603ec	zadorlab	TRUE	FALSE	FALSE	FALSE	FALSE	FALSE	FALSE	FALSE	TRUE	TRUE	TRUE	TRUE	TRUE	TRUE	TRUE	FALSE	FALSE	FALSE	FALSE	TRUE	FALSE	FALSE	FALSE	FALSE	FALSE	FALSE	FALSE	FALSE	FALSE	FALSE	FALSE	FALSE	FALSE	FALSE	FALSE	FALSE	FALSE	FALSE	FALSE	FALSE	FALSE	FALSE	FALSE	FALSE	FALSE	FALSE
		19baa84c-22a5-4589-9cbd-c23f111c054c	hoferlab	TRUE	FALSE	TRUE	FALSE	FALSE	FALSE	TRUE	TRUE	TRUE	TRUE	TRUE	TRUE	TRUE	TRUE	TRUE	TRUE	TRUE	TRUE	TRUE	TRUE	TRUE	TRUE	FALSE	FALSE	FALSE	FALSE	TRUE	FALSE	TRUE	TRUE	TRUE	TRUE	TRUE	TRUE	TRUE	TRUE	TRUE	TRUE	TRUE	TRUE	FALSE	TRUE	TRUE	TRUE	FALSE	FALSE
		143dd7cf-6a47-47a1-906d-927ad7fe9117	mrsicflogellab	TRUE	FALSE	TRUE	FALSE	FALSE	FALSE	TRUE	TRUE	TRUE	TRUE	TRUE	TRUE	TRUE	TRUE	TRUE	TRUE	TRUE	TRUE	TRUE	TRUE	TRUE	TRUE	FALSE	FALSE	TRUE	FALSE	TRUE	FALSE	FALSE	TRUE	TRUE	TRUE	TRUE	TRUE	TRUE	TRUE	TRUE	TRUE	TRUE	TRUE	FALSE	TRUE	TRUE	TRUE	TRUE	TRUE
		84bb830f-b9ff-4e6b-9296-f458fb41d160	mainenlab	TRUE	FALSE	TRUE	FALSE	FALSE	FALSE	TRUE	TRUE	TRUE	TRUE	TRUE	TRUE	TRUE	TRUE	TRUE	TRUE	TRUE	TRUE	TRUE	TRUE	TRUE	TRUE	FALSE	FALSE	TRUE	TRUE	FALSE	TRUE	TRUE	TRUE	TRUE	TRUE	TRUE	TRUE	TRUE	TRUE	TRUE	TRUE	TRUE	TRUE	TRUE	TRUE	TRUE	TRUE	TRUE	TRUE
		730770d6-617a-4ada-95db-a48521befda5	churchlandlab_ucla	TRUE	FALSE	TRUE	FALSE	FALSE	FALSE	TRUE	TRUE	TRUE	TRUE	TRUE	TRUE	TRUE	TRUE	TRUE	TRUE	TRUE	TRUE	TRUE	TRUE	TRUE	TRUE	FALSE	FALSE	TRUE	TRUE	TRUE	TRUE	FALSE	TRUE	TRUE	TRUE	TRUE	TRUE	TRUE	TRUE	TRUE	FALSE	TRUE	TRUE	TRUE	TRUE	TRUE	TRUE	TRUE	TRUE
		7a620688-66cb-44d3-b79b-ccac1c8ba23e	churchlandlab_ucla	TRUE	FALSE	TRUE	FALSE	FALSE	FALSE	TRUE	TRUE	TRUE	TRUE	TRUE	TRUE	TRUE	TRUE	TRUE	TRUE	TRUE	TRUE	TRUE	TRUE	TRUE	TRUE	FALSE	FALSE	FALSE	TRUE	TRUE	TRUE	TRUE	TRUE	TRUE	TRUE	TRUE	TRUE	TRUE	TRUE	TRUE	TRUE	TRUE	TRUE	TRUE	TRUE	TRUE	TRUE	TRUE	TRUE
		02cc03e4-8015-4050-bb42-6c832091febb	churchlandlab_ucla	TRUE	FALSE	TRUE	FALSE	FALSE	FALSE	TRUE	TRUE	TRUE	TRUE	TRUE	TRUE	TRUE	TRUE	TRUE	TRUE	TRUE	TRUE	TRUE	TRUE	TRUE	TRUE	FALSE	FALSE	FALSE	TRUE	FALSE	FALSE	TRUE	TRUE	TRUE	TRUE	TRUE	TRUE	TRUE	TRUE	FALSE	TRUE	TRUE	TRUE	FALSE	TRUE	TRUE	TRUE	FALSE	FALSE
		a12c8ae8-d5ad-4d15-b805-436ad23e5ad1	wittenlab	TRUE	FALSE	TRUE	TRUE	FALSE	FALSE	TRUE	TRUE	TRUE	TRUE	TRUE	TRUE	TRUE	TRUE	TRUE	TRUE	TRUE	TRUE	TRUE	TRUE	TRUE	TRUE	FALSE	FALSE	TRUE	TRUE	FALSE	TRUE	TRUE	TRUE	TRUE	TRUE	TRUE	TRUE	TRUE	TRUE	TRUE	TRUE	TRUE	TRUE	TRUE	TRUE	TRUE	TRUE	FALSE	FALSE
		523f8301-4f56-4faf-ab33-a9ff11331118	mainenlab	TRUE	FALSE	TRUE	TRUE	FALSE	FALSE	TRUE	TRUE	TRUE	TRUE	TRUE	TRUE	TRUE	TRUE	TRUE	TRUE	TRUE	TRUE	TRUE	TRUE	TRUE	TRUE	FALSE	FALSE	TRUE	TRUE	FALSE	TRUE	FALSE	TRUE	TRUE	TRUE	TRUE	TRUE	TRUE	TRUE	TRUE	FALSE	TRUE	TRUE	TRUE	TRUE	TRUE	TRUE	TRUE	TRUE
		b749446c-18e3-4987-820a-50649ab0f826	cortexlab	TRUE	FALSE	TRUE	FALSE	FALSE	FALSE	TRUE	TRUE	TRUE	TRUE	TRUE	TRUE	TRUE	TRUE	TRUE	TRUE	TRUE	TRUE	TRUE	TRUE	TRUE	TRUE	FALSE	FALSE	TRUE	TRUE	TRUE	TRUE	TRUE	TRUE	TRUE	TRUE	TRUE	TRUE	TRUE	TRUE	TRUE	TRUE	TRUE	TRUE	TRUE	TRUE	TRUE	TRUE	FALSE	FALSE
		36362f75-96d8-4ed4-a728-5e72284d0995	mainenlab	TRUE	FALSE	TRUE	FALSE	FALSE	FALSE	TRUE	TRUE	TRUE	TRUE	TRUE	TRUE	TRUE	TRUE	TRUE	TRUE	TRUE	TRUE	TRUE	TRUE	TRUE	TRUE	FALSE	FALSE	TRUE	FALSE	TRUE	TRUE	FALSE	TRUE	TRUE	TRUE	TRUE	TRUE	TRUE	TRUE	TRUE	FALSE	TRUE	TRUE	TRUE	TRUE	TRUE	TRUE	FALSE	FALSE
		8abf098f-d4f6-4957-9c0a-f53685db74cc	cortexlab	TRUE	FALSE	TRUE	FALSE	FALSE	FALSE	TRUE	TRUE	TRUE	TRUE	TRUE	TRUE	TRUE	TRUE	TRUE	TRUE	TRUE	TRUE	TRUE	TRUE	TRUE	TRUE	FALSE	FALSE	FALSE	FALSE	TRUE	FALSE	TRUE	TRUE	TRUE	TRUE	TRUE	TRUE	TRUE	TRUE	FALSE	TRUE	TRUE	TRUE	FALSE	TRUE	TRUE	TRUE	FALSE	FALSE
		49c2ea3d-2b50-4e8a-b124-9e190960784e	steinmetzlab	TRUE	FALSE	TRUE	FALSE	FALSE	FALSE	TRUE	TRUE	FALSE	FALSE	FALSE	FALSE	FALSE	FALSE	FALSE	FALSE	FALSE	FALSE	FALSE	TRUE	FALSE	FALSE	FALSE	FALSE	FALSE	FALSE	FALSE	FALSE	FALSE	FALSE	FALSE	FALSE	FALSE	FALSE	FALSE	FALSE	FALSE	FALSE	FALSE	FALSE	FALSE	FALSE	FALSE	FALSE	FALSE	FALSE
		84fd7fa3-6c2d-4233-b265-46a427d3d68d	wittenlab	TRUE	FALSE	TRUE	FALSE	FALSE	FALSE	TRUE	TRUE	TRUE	FALSE	FALSE	FALSE	FALSE	FALSE	FALSE	TRUE	TRUE	TRUE	FALSE	TRUE	TRUE	TRUE	FALSE	FALSE	TRUE	TRUE	FALSE	TRUE	FALSE	TRUE	TRUE	TRUE	TRUE	TRUE	TRUE	TRUE	TRUE	FALSE	TRUE	FALSE	TRUE	TRUE	TRUE	TRUE	FALSE	FALSE
		63a32e5c-f63a-450d-85cb-140947b67eaf	mainenlab	TRUE	FALSE	TRUE	TRUE	FALSE	FALSE	TRUE	TRUE	TRUE	TRUE	TRUE	TRUE	TRUE	TRUE	TRUE	TRUE	TRUE	TRUE	TRUE	TRUE	TRUE	TRUE	FALSE	FALSE	FALSE	TRUE	FALSE	FALSE	FALSE	TRUE	TRUE	TRUE	TRUE	TRUE	TRUE	TRUE	FALSE	FALSE	TRUE	TRUE	FALSE	TRUE	TRUE	TRUE	FALSE	FALSE
		ee3345e6-540d-4cea-9e4a-7f1b2fb9a4e4	churchlandlab_ucla	TRUE	FALSE	TRUE	FALSE	FALSE	FALSE	TRUE	TRUE	TRUE	TRUE	TRUE	TRUE	TRUE	TRUE	TRUE	TRUE	TRUE	TRUE	TRUE	TRUE	TRUE	TRUE	FALSE	FALSE	TRUE	TRUE	TRUE	FALSE	TRUE	TRUE	TRUE	TRUE	TRUE	TRUE	TRUE	TRUE	TRUE	TRUE	TRUE	TRUE	FALSE	TRUE	TRUE	TRUE	FALSE	FALSE
		c6e294f7-5421-4697-8618-8ccc9b0269f6	churchlandlab_ucla	TRUE	FALSE	TRUE	FALSE	FALSE	FALSE	TRUE	TRUE	TRUE	TRUE	TRUE	TRUE	TRUE	TRUE	TRUE	TRUE	TRUE	TRUE	TRUE	TRUE	TRUE	TRUE	FALSE	FALSE	FALSE	FALSE	TRUE	FALSE	FALSE	TRUE	TRUE	TRUE	TRUE	TRUE	TRUE	TRUE	TRUE	TRUE	TRUE	TRUE	FALSE	TRUE	TRUE	TRUE	FALSE	FALSE
		6d9b6393-6729-4a15-ad08-c6838842a074	churchlandlab_ucla	TRUE	FALSE	TRUE	FALSE	FALSE	FALSE	TRUE	TRUE	TRUE	TRUE	TRUE	TRUE	TRUE	TRUE	TRUE	TRUE	TRUE	TRUE	TRUE	TRUE	TRUE	TRUE	FALSE	FALSE	FALSE	TRUE	TRUE	FALSE	FALSE	TRUE	TRUE	TRUE	TRUE	TRUE	TRUE	TRUE	FALSE	FALSE	TRUE	TRUE	FALSE	TRUE	TRUE	FALSE	FALSE	FALSE
		485b50c8-71e1-4654-9a07-64395c15f5ed	steinmetzlab	TRUE	FALSE	TRUE	FALSE	FALSE	FALSE	TRUE	TRUE	TRUE	TRUE	TRUE	TRUE	TRUE	TRUE	TRUE	TRUE	TRUE	TRUE	TRUE	TRUE	TRUE	TRUE	FALSE	FALSE	FALSE	TRUE	FALSE	FALSE	FALSE	TRUE	TRUE	TRUE	TRUE	TRUE	TRUE	TRUE	TRUE	TRUE	TRUE	TRUE	FALSE	TRUE	TRUE	TRUE	TRUE	TRUE
		3fded122-619c-4e65-aadd-d5420978d167	steinmetzlab	TRUE	FALSE	TRUE	FALSE	FALSE	FALSE	TRUE	TRUE	TRUE	TRUE	TRUE	TRUE	TRUE	TRUE	TRUE	TRUE	TRUE	TRUE	TRUE	TRUE	TRUE	TRUE	FALSE	FALSE	FALSE	TRUE	FALSE	FALSE	TRUE	TRUE	TRUE	TRUE	TRUE	TRUE	TRUE	TRUE	FALSE	TRUE	TRUE	TRUE	FALSE	TRUE	TRUE	TRUE	FALSE	FALSE
		9657af01-50bd-4120-8303-416ad9e24a51	zadorlab	TRUE	FALSE	TRUE	FALSE	FALSE	FALSE	TRUE	TRUE	TRUE	TRUE	TRUE	TRUE	TRUE	TRUE	TRUE	TRUE	TRUE	TRUE	TRUE	TRUE	TRUE	TRUE	FALSE	FALSE	FALSE	TRUE	FALSE	FALSE	FALSE	TRUE	TRUE	TRUE	TRUE	TRUE	TRUE	TRUE	FALSE	TRUE	TRUE	FALSE	FALSE	TRUE	TRUE	TRUE	FALSE	FALSE
		bbe6ebc1-d32f-42dd-a89c-211226737deb	cortexlab	TRUE	FALSE	TRUE	FALSE	FALSE	FALSE	TRUE	TRUE	FALSE	FALSE	FALSE	FALSE	FALSE	FALSE	FALSE	TRUE	TRUE	TRUE	TRUE	TRUE	TRUE	TRUE	FALSE	FALSE	TRUE	TRUE	TRUE	FALSE	TRUE	TRUE	TRUE	TRUE	TRUE	TRUE	TRUE	TRUE	TRUE	TRUE	TRUE	TRUE	FALSE	TRUE	TRUE	TRUE	FALSE	FALSE
		dab512bd-a02d-4c1f-8dbc-9155a163efc0	danlab	TRUE	FALSE	TRUE	FALSE	FALSE	FALSE	TRUE	TRUE	TRUE	FALSE	TRUE	TRUE	FALSE	TRUE	TRUE	TRUE	TRUE	TRUE	TRUE	TRUE	TRUE	TRUE	FALSE	FALSE	TRUE	TRUE	TRUE	FALSE	TRUE	TRUE	TRUE	TRUE	TRUE	TRUE	TRUE	TRUE	TRUE	TRUE	TRUE	TRUE	TRUE	TRUE	TRUE	TRUE	TRUE	TRUE
		1f5d62cb-814f-4ab2-b6af-7557ea04d56a	mainenlab	TRUE	FALSE	TRUE	FALSE	FALSE	FALSE	TRUE	TRUE	TRUE	TRUE	TRUE	TRUE	TRUE	TRUE	TRUE	FALSE	FALSE	FALSE	FALSE	TRUE	FALSE	FALSE	FALSE	FALSE	FALSE	FALSE	FALSE	FALSE	FALSE	FALSE	FALSE	FALSE	FALSE	FALSE	FALSE	FALSE	FALSE	FALSE	FALSE	FALSE	FALSE	FALSE	FALSE	FALSE	FALSE	FALSE
		f9d8aacd-b2a0-49f2-bd71-c2f5aadcfdd1	churchlandlab_ucla	TRUE	FALSE	TRUE	FALSE	FALSE	FALSE	TRUE	TRUE	TRUE	TRUE	TRUE	TRUE	TRUE	TRUE	TRUE	TRUE	TRUE	TRUE	TRUE	TRUE	TRUE	TRUE	FALSE	FALSE	TRUE	TRUE	TRUE	FALSE	FALSE	TRUE	TRUE	TRUE	TRUE	TRUE	TRUE	TRUE	TRUE	FALSE	TRUE	TRUE	FALSE	TRUE	TRUE	TRUE	FALSE	FALSE
		0aafb6f1-6c10-4886-8f03-543988e02d9e	steinmetzlab	TRUE	FALSE	TRUE	FALSE	FALSE	FALSE	TRUE	TRUE	TRUE	TRUE	TRUE	TRUE	TRUE	TRUE	TRUE	TRUE	TRUE	TRUE	TRUE	TRUE	TRUE	TRUE	FALSE	FALSE	FALSE	TRUE	FALSE	FALSE	TRUE	TRUE	TRUE	TRUE	TRUE	TRUE	TRUE	TRUE	FALSE	TRUE	TRUE	TRUE	FALSE	TRUE	TRUE	TRUE	TRUE	TRUE
		94e948c1-f7be-4868-893a-f7cd2df3313e	churchlandlab_ucla	TRUE	FALSE	FALSE	FALSE	FALSE	FALSE	FALSE	FALSE	TRUE	TRUE	TRUE	TRUE	TRUE	TRUE	TRUE	FALSE	FALSE	FALSE	FALSE	TRUE	FALSE	FALSE	FALSE	FALSE	FALSE	FALSE	FALSE	FALSE	FALSE	FALSE	FALSE	FALSE	FALSE	FALSE	FALSE	FALSE	FALSE	FALSE	FALSE	FALSE	FALSE	FALSE	FALSE	FALSE	FALSE	FALSE
FAILED (AUTOMATIC CURATION)	Low trials	b2746c16-7152-45a3-a7f0-477985638638	hoferlab	TRUE	FALSE	FALSE	FALSE	FALSE	FALSE	FALSE	FALSE	TRUE	FALSE	TRUE	TRUE	FALSE	TRUE	TRUE	FALSE	FALSE	TRUE	FALSE	TRUE	FALSE	FALSE	FALSE	FALSE	FALSE	FALSE	FALSE	FALSE	FALSE	FALSE	FALSE	FALSE	FALSE	FALSE	FALSE	FALSE	FALSE	FALSE	FALSE	FALSE	FALSE	FALSE	FALSE	FALSE	FALSE	FALSE
		1f3d3fcb-f188-47a2-87e5-ac1db6cf393a	cortexlab	TRUE	FALSE	FALSE	FALSE	FALSE	FALSE	FALSE	FALSE	TRUE	TRUE	TRUE	TRUE	TRUE	TRUE	TRUE	FALSE	FALSE	TRUE	FALSE	TRUE	FALSE	FALSE	FALSE	FALSE	FALSE	FALSE	FALSE	FALSE	FALSE	FALSE	FALSE	FALSE	FALSE	FALSE	FALSE	FALSE	FALSE	FALSE	FALSE	FALSE	FALSE	FALSE	FALSE	FALSE	FALSE	FALSE
		7f3dddf8-637f-47bb-a7b7-e303277b2107	churchlandlab	TRUE	FALSE	FALSE	FALSE	FALSE	FALSE	FALSE	FALSE	TRUE	TRUE	TRUE	TRUE	TRUE	TRUE	TRUE	FALSE	FALSE	FALSE	FALSE	TRUE	FALSE	FALSE	FALSE	FALSE	FALSE	FALSE	FALSE	FALSE	FALSE	FALSE	FALSE	FALSE	FALSE	FALSE	FALSE	FALSE	FALSE	FALSE	FALSE	FALSE	FALSE	FALSE	FALSE	FALSE	FALSE	FALSE
		ca5764ea-a57e-49de-8156-84da18ad439f	zadorlab	TRUE	FALSE	FALSE	FALSE	FALSE	FALSE	FALSE	FALSE	TRUE	TRUE	TRUE	TRUE	TRUE	TRUE	TRUE	FALSE	FALSE	TRUE	FALSE	TRUE	FALSE	FALSE	FALSE	FALSE	FALSE	FALSE	FALSE	FALSE	FALSE	FALSE	FALSE	FALSE	FALSE	FALSE	FALSE	FALSE	FALSE	FALSE	FALSE	FALSE	FALSE	FALSE	FALSE	FALSE	FALSE	FALSE
		ae252f7b-0224-4925-8174-7b25c2385bb7	cortexlab	TRUE	FALSE	FALSE	FALSE	FALSE	FALSE	FALSE	FALSE	TRUE	TRUE	TRUE	TRUE	TRUE	TRUE	TRUE	FALSE	FALSE	TRUE	FALSE	TRUE	FALSE	FALSE	FALSE	FALSE	FALSE	FALSE	FALSE	FALSE	FALSE	FALSE	FALSE	FALSE	FALSE	FALSE	FALSE	FALSE	FALSE	FALSE	FALSE	FALSE	FALSE	FALSE	FALSE	FALSE	FALSE	FALSE
	Low yield	dc50c3de-5d84-4408-9725-22ae55b93522	mrsicflogellab	TRUE	FALSE	FALSE	FALSE	FALSE	FALSE	FALSE	FALSE	TRUE	TRUE	TRUE	TRUE	TRUE	TRUE	TRUE	FALSE	FALSE	FALSE	FALSE	TRUE	FALSE	FALSE	FALSE	FALSE	FALSE	FALSE	FALSE	FALSE	FALSE	FALSE	FALSE	FALSE	FALSE	FALSE	FALSE	FALSE	FALSE	FALSE	FALSE	FALSE	FALSE	FALSE	FALSE	FALSE	FALSE	FALSE
	Noise (LFP)	11a5a93e-58a9-4ed0-995e-52279ec16b98	wittenlab	TRUE	FALSE	TRUE	FALSE	FALSE	FALSE	TRUE	TRUE	TRUE	TRUE	TRUE	TRUE	TRUE	TRUE	TRUE	FALSE	FALSE	FALSE	FALSE	TRUE	FALSE	FALSE	FALSE	FALSE	FALSE	FALSE	FALSE	FALSE	FALSE	FALSE	FALSE	FALSE	FALSE	FALSE	FALSE	FALSE	FALSE	FALSE	FALSE	FALSE	FALSE	FALSE	FALSE	FALSE	FALSE	FALSE
FAILED (MANUAL CURATION)	Hardware failure	143cff36-30b4-4b25-9d26-5a2dbe6f6fc2	wittenlab	FALSE	FALSE	FALSE	FALSE	FALSE	FALSE	FALSE	FALSE	FALSE	FALSE	FALSE	FALSE	FALSE	FALSE	FALSE	FALSE	FALSE	FALSE	FALSE	FALSE	FALSE	FALSE	FALSE	FALSE	FALSE	FALSE	FALSE	FALSE	FALSE	FALSE	FALSE	FALSE	FALSE	FALSE	FALSE	FALSE	FALSE	FALSE	FALSE	FALSE	FALSE	FALSE	FALSE	FALSE	FALSE	FALSE
		79bcfe47-33ed-4432-a598-66006b4cde56	steinmetzlab	FALSE	FALSE	FALSE	FALSE	FALSE	FALSE	FALSE	FALSE	FALSE	FALSE	FALSE	FALSE	FALSE	FALSE	FALSE	FALSE	FALSE	FALSE	FALSE	FALSE	FALSE	FALSE	FALSE	FALSE	FALSE	FALSE	FALSE	FALSE	FALSE	FALSE	FALSE	FALSE	FALSE	FALSE	FALSE	FALSE	FALSE	FALSE	FALSE	FALSE	FALSE	FALSE	FALSE	FALSE	FALSE	FALSE
		80624507-4be6-4689-92df-0e2c26c3faf3	angelakilab	FALSE	FALSE	FALSE	FALSE	FALSE	FALSE	FALSE	FALSE	TRUE	TRUE	TRUE	TRUE	TRUE	TRUE	TRUE	FALSE	FALSE	FALSE	FALSE	FALSE	FALSE	FALSE	FALSE	FALSE	FALSE	FALSE	FALSE	FALSE	FALSE	FALSE	FALSE	FALSE	FALSE	FALSE	FALSE	FALSE	FALSE	FALSE	FALSE	FALSE	FALSE	FALSE	FALSE	FALSE	FALSE	FALSE
		e7abb87f-4324-4c89-8a46-97ed4b40577e	wittenlab	FALSE	FALSE	FALSE	FALSE	FALSE	FALSE	FALSE	FALSE	FALSE	FALSE	FALSE	FALSE	FALSE	FALSE	FALSE	FALSE	FALSE	FALSE	FALSE	FALSE	FALSE	FALSE	FALSE	FALSE	FALSE	FALSE	FALSE	FALSE	FALSE	FALSE	FALSE	FALSE	FALSE	FALSE	FALSE	FALSE	FALSE	FALSE	FALSE	FALSE	FALSE	FALSE	FALSE	FALSE	FALSE	FALSE
		f936a701-5f8a-4aa1-b7a9-9f8b5b69bc7c	churchlandlab	FALSE	FALSE	FALSE	FALSE	FALSE	FALSE	FALSE	FALSE	TRUE	TRUE	TRUE	TRUE	TRUE	TRUE	TRUE	FALSE	FALSE	FALSE	FALSE	FALSE	FALSE	FALSE	FALSE	FALSE	FALSE	FALSE	FALSE	FALSE	FALSE	FALSE	FALSE	FALSE	FALSE	FALSE	FALSE	FALSE	FALSE	FALSE	FALSE	FALSE	FALSE	FALSE	FALSE	FALSE	FALSE	FALSE
		fc626c12-bd1e-45c3-9434-4a7a8c81d7c0	wittenlab	FALSE	FALSE	FALSE	FALSE	FALSE	FALSE	FALSE	FALSE	FALSE	FALSE	FALSE	FALSE	FALSE	FALSE	FALSE	FALSE	FALSE	FALSE	FALSE	FALSE	FALSE	FALSE	FALSE	FALSE	FALSE	FALSE	FALSE	FALSE	FALSE	FALSE	FALSE	FALSE	FALSE	FALSE	FALSE	FALSE	FALSE	FALSE	FALSE	FALSE	FALSE	FALSE	FALSE	FALSE	FALSE	FALSE
		d8ff1218-75e1-4962-b920-98c40b9dea1a	steinmetzlab	FALSE	FALSE	FALSE	FALSE	FALSE	FALSE	FALSE	FALSE	FALSE	FALSE	FALSE	FALSE	FALSE	FALSE	FALSE	FALSE	FALSE	FALSE	FALSE	FALSE	FALSE	FALSE	FALSE	FALSE	FALSE	FALSE	FALSE	FALSE	FALSE	FALSE	FALSE	FALSE	FALSE	FALSE	FALSE	FALSE	FALSE	FALSE	FALSE	FALSE	FALSE	FALSE	FALSE	FALSE	FALSE	FALSE
		41a3b948-13f4-4be7-90b9-150705d39005	angelakilab	FALSE	FALSE	FALSE	FALSE	FALSE	FALSE	FALSE	FALSE	TRUE	TRUE	TRUE	TRUE	TRUE	TRUE	TRUE	FALSE	FALSE	FALSE	FALSE	FALSE	FALSE	FALSE	FALSE	FALSE	FALSE	FALSE	FALSE	FALSE	FALSE	FALSE	FALSE	FALSE	FALSE	FALSE	FALSE	FALSE	FALSE	FALSE	FALSE	FALSE	FALSE	FALSE	FALSE	FALSE	FALSE	FALSE
		99b8eb91-393d-4ed1-913e-ce5ee2e31bc3	hausserlab	FALSE	FALSE	FALSE	FALSE	FALSE	FALSE	FALSE	FALSE	FALSE	FALSE	FALSE	FALSE	FALSE	FALSE	FALSE	FALSE	FALSE	FALSE	FALSE	FALSE	FALSE	FALSE	FALSE	FALSE	FALSE	FALSE	FALSE	FALSE	FALSE	FALSE	FALSE	FALSE	FALSE	FALSE	FALSE	FALSE	FALSE	FALSE	FALSE	FALSE	FALSE	FALSE	FALSE	FALSE	FALSE	FALSE
		9e44ddb5-7c7c-48f1-954a-6cec2ad26088	cortexlab	FALSE	FALSE	FALSE	FALSE	FALSE	FALSE	FALSE	FALSE	TRUE	TRUE	TRUE	TRUE	TRUE	TRUE	TRUE	FALSE	FALSE	FALSE	FALSE	FALSE	FALSE	FALSE	FALSE	FALSE	FALSE	FALSE	FALSE	FALSE	FALSE	FALSE	FALSE	FALSE	FALSE	FALSE	FALSE	FALSE	FALSE	FALSE	FALSE	FALSE	FALSE	FALSE	FALSE	FALSE	FALSE	FALSE
	No usable histology	3443eceb-50b3-450e-b7c1-fc465a3bc84f	zadorlab	FALSE	FALSE	FALSE	FALSE	FALSE	FALSE	FALSE	FALSE	FALSE	FALSE	FALSE	FALSE	FALSE	FALSE	FALSE	FALSE	FALSE	FALSE	FALSE	FALSE	FALSE	FALSE	FALSE	FALSE	FALSE	FALSE	FALSE	FALSE	FALSE	FALSE	FALSE	FALSE	FALSE	FALSE	FALSE	FALSE	FALSE	FALSE	FALSE	FALSE	FALSE	FALSE	FALSE	FALSE	FALSE	FALSE
		553f8d56-b6e7-46bd-a146-ac43b8ec6de7	mainenlab	FALSE	FALSE	FALSE	FALSE	FALSE	FALSE	FALSE	FALSE	FALSE	FALSE	FALSE	FALSE	FALSE	FALSE	FALSE	FALSE	FALSE	FALSE	FALSE	FALSE	FALSE	FALSE	FALSE	FALSE	FALSE	FALSE	FALSE	FALSE	FALSE	FALSE	FALSE	FALSE	FALSE	FALSE	FALSE	FALSE	FALSE	FALSE	FALSE	FALSE	FALSE	FALSE	FALSE	FALSE	FALSE	FALSE
		6bfa4a99-bdfa-4e44-aa01-9c7eac7e253d	zadorlab	FALSE	FALSE	FALSE	FALSE	FALSE	FALSE	FALSE	FALSE	FALSE	FALSE	FALSE	FALSE	FALSE	FALSE	FALSE	FALSE	FALSE	FALSE	FALSE	FALSE	FALSE	FALSE	FALSE	FALSE	FALSE	FALSE	FALSE	FALSE	FALSE	FALSE	FALSE	FALSE	FALSE	FALSE	FALSE	FALSE	FALSE	FALSE	FALSE	FALSE	FALSE	FALSE	FALSE	FALSE	FALSE	FALSE
		82a42cdf-3140-427b-8ad0-0d504716c871	angelakilab	FALSE	FALSE	FALSE	FALSE	FALSE	FALSE	FALSE	FALSE	TRUE	TRUE	TRUE	TRUE	TRUE	TRUE	TRUE	FALSE	FALSE	FALSE	FALSE	FALSE	FALSE	FALSE	FALSE	FALSE	FALSE	FALSE	FALSE	FALSE	FALSE	FALSE	FALSE	FALSE	FALSE	FALSE	FALSE	FALSE	FALSE	FALSE	FALSE	FALSE	FALSE	FALSE	FALSE	FALSE	FALSE	FALSE
		dc6eea9b-a8fb-4151-b298-718f321e6968	wittenlab	FALSE	FALSE	FALSE	FALSE	FALSE	FALSE	FALSE	FALSE	FALSE	FALSE	FALSE	FALSE	FALSE	FALSE	FALSE	FALSE	FALSE	FALSE	FALSE	FALSE	FALSE	FALSE	FALSE	FALSE	FALSE	FALSE	FALSE	FALSE	FALSE	FALSE	FALSE	FALSE	FALSE	FALSE	FALSE	FALSE	FALSE	FALSE	FALSE	FALSE	FALSE	FALSE	FALSE	FALSE	FALSE	FALSE
		81347b01-b2a2-4985-b1b1-436fb83049d1	steinmetzlab	FALSE	FALSE	FALSE	FALSE	FALSE	FALSE	FALSE	FALSE	FALSE	FALSE	FALSE	FALSE	FALSE	FALSE	FALSE	FALSE	FALSE	FALSE	FALSE	FALSE	FALSE	FALSE	FALSE	FALSE	FALSE	FALSE	FALSE	FALSE	FALSE	FALSE	FALSE	FALSE	FALSE	FALSE	FALSE	FALSE	FALSE	FALSE	FALSE	FALSE	FALSE	FALSE	FALSE	FALSE	FALSE	FALSE
		978b4073-e3b0-440a-a336-cd26e3bae8ea	steinmetzlab	FALSE	FALSE	FALSE	FALSE	FALSE	FALSE	FALSE	FALSE	FALSE	FALSE	FALSE	FALSE	FALSE	FALSE	FALSE	FALSE	FALSE	FALSE	FALSE	FALSE	FALSE	FALSE	FALSE	FALSE	FALSE	FALSE	FALSE	FALSE	FALSE	FALSE	FALSE	FALSE	FALSE	FALSE	FALSE	FALSE	FALSE	FALSE	FALSE	FALSE	FALSE	FALSE	FALSE	FALSE	FALSE	FALSE
		c5130b6f-f584-4514-8be4-22bcde848a60	hausserlab	FALSE	FALSE	FALSE	FALSE	FALSE	FALSE	FALSE	FALSE	FALSE	FALSE	FALSE	FALSE	FALSE	FALSE	FALSE	FALSE	FALSE	FALSE	FALSE	FALSE	FALSE	FALSE	FALSE	FALSE	FALSE	FALSE	FALSE	FALSE	FALSE	FALSE	FALSE	FALSE	FALSE	FALSE	FALSE	FALSE	FALSE	FALSE	FALSE	FALSE	FALSE	FALSE	FALSE	FALSE	FALSE	FALSE
	Poor ephys (Drift)	341ef9bb-25f9-4eeb-8f1d-bdd054b22ba8	churchlandlab	FALSE	FALSE	FALSE	FALSE	FALSE	TRUE	FALSE	FALSE	TRUE	TRUE	TRUE	TRUE	TRUE	TRUE	TRUE	FALSE	FALSE	FALSE	FALSE	FALSE	FALSE	FALSE	FALSE	FALSE	FALSE	FALSE	FALSE	FALSE	FALSE	FALSE	FALSE	FALSE	FALSE	FALSE	FALSE	FALSE	FALSE	FALSE	FALSE	FALSE	FALSE	FALSE	FALSE	FALSE	FALSE	FALSE
	Poor ephys (Noisy channels)	0132a739-be48-494a-a722-c4299b266d29	churchlandlab_ucla	FALSE	FALSE	FALSE	FALSE	FALSE	FALSE	FALSE	FALSE	FALSE	FALSE	FALSE	FALSE	FALSE	FALSE	FALSE	FALSE	FALSE	FALSE	FALSE	FALSE	FALSE	FALSE	FALSE	FALSE	FALSE	FALSE	FALSE	FALSE	FALSE	FALSE	FALSE	FALSE	FALSE	FALSE	FALSE	FALSE	FALSE	FALSE	FALSE	FALSE	FALSE	FALSE	FALSE	FALSE	FALSE	FALSE
		1b1028b4-17fd-4235-97b4-a9bdccdd51af	hausserlab	FALSE	FALSE	FALSE	FALSE	FALSE	FALSE	FALSE	FALSE	FALSE	FALSE	FALSE	FALSE	FALSE	FALSE	FALSE	FALSE	FALSE	FALSE	FALSE	FALSE	FALSE	FALSE	FALSE	FALSE	FALSE	FALSE	FALSE	FALSE	FALSE	FALSE	FALSE	FALSE	FALSE	FALSE	FALSE	FALSE	FALSE	FALSE	FALSE	FALSE	FALSE	FALSE	FALSE	FALSE	FALSE	FALSE
		44fc10b1-ec82-4f88-afbf-10a6f8a1b5d8	cortexlab	FALSE	FALSE	FALSE	FALSE	FALSE	FALSE	FALSE	FALSE	TRUE	TRUE	TRUE	TRUE	TRUE	TRUE	TRUE	FALSE	FALSE	FALSE	FALSE	FALSE	FALSE	FALSE	FALSE	FALSE	FALSE	FALSE	FALSE	FALSE	FALSE	FALSE	FALSE	FALSE	FALSE	FALSE	FALSE	FALSE	FALSE	FALSE	FALSE	FALSE	FALSE	FALSE	FALSE	FALSE	FALSE	FALSE
		ef3d059a-59d5-4870-b355-563a8d7cfd2d	wittenlab	FALSE	FALSE	FALSE	FALSE	FALSE	FALSE	FALSE	FALSE	TRUE	FALSE	TRUE	TRUE	FALSE	TRUE	TRUE	FALSE	FALSE	FALSE	FALSE	FALSE	FALSE	FALSE	FALSE	FALSE	FALSE	FALSE	FALSE	FALSE	FALSE	FALSE	FALSE	FALSE	FALSE	FALSE	FALSE	FALSE	FALSE	FALSE	FALSE	FALSE	FALSE	FALSE	FALSE	FALSE	FALSE	FALSE
		d7361c6f-6751-4b5f-91c2-fdd61f988aa4	churchlandlab_ucla	FALSE	FALSE	FALSE	FALSE	FALSE	FALSE	FALSE	FALSE	FALSE	FALSE	FALSE	FALSE	FALSE	FALSE	FALSE	FALSE	FALSE	FALSE	FALSE	FALSE	FALSE	FALSE	FALSE	FALSE	FALSE	FALSE	FALSE	FALSE	FALSE	FALSE	FALSE	FALSE	FALSE	FALSE	FALSE	FALSE	FALSE	FALSE	FALSE	FALSE	FALSE	FALSE	FALSE	FALSE	FALSE	FALSE
		f8d0ecdc-b7bd-44cc-b887-3d544e24e561	angelakilab	FALSE	FALSE	FALSE	FALSE	FALSE	FALSE	FALSE	FALSE	TRUE	TRUE	TRUE	TRUE	TRUE	TRUE	TRUE	FALSE	FALSE	FALSE	FALSE	FALSE	FALSE	FALSE	FALSE	FALSE	FALSE	FALSE	FALSE	FALSE	FALSE	FALSE	FALSE	FALSE	FALSE	FALSE	FALSE	FALSE	FALSE	FALSE	FALSE	FALSE	FALSE	FALSE	FALSE	FALSE	FALSE	FALSE
		72f89097-4836-4b67-a47a-edb3285a6e83	wittenlab	FALSE	FALSE	FALSE	FALSE	FALSE	FALSE	FALSE	FALSE	TRUE	TRUE	TRUE	TRUE	TRUE	TRUE	TRUE	FALSE	FALSE	FALSE	FALSE	FALSE	FALSE	FALSE	FALSE	FALSE	FALSE	FALSE	FALSE	FALSE	FALSE	FALSE	FALSE	FALSE	FALSE	FALSE	FALSE	FALSE	FALSE	FALSE	FALSE	FALSE	FALSE	FALSE	FALSE	FALSE	FALSE	FALSE
		8185f1e9-cfe0-4fd6-8d7e-446a8051c588	angelakilab	FALSE	FALSE	FALSE	FALSE	FALSE	FALSE	FALSE	FALSE	TRUE	TRUE	TRUE	TRUE	TRUE	TRUE	TRUE	FALSE	FALSE	FALSE	FALSE	FALSE	FALSE	FALSE	FALSE	FALSE	FALSE	FALSE	FALSE	FALSE	FALSE	FALSE	FALSE	FALSE	FALSE	FALSE	FALSE	FALSE	FALSE	FALSE	FALSE	FALSE	FALSE	FALSE	FALSE	FALSE	FALSE	FALSE
		64775a68-73ed-42a2-b7c7-371625a6d728	hausserlab	FALSE	FALSE	FALSE	FALSE	FALSE	FALSE	FALSE	FALSE	FALSE	FALSE	FALSE	FALSE	FALSE	FALSE	FALSE	FALSE	FALSE	FALSE	FALSE	FALSE	FALSE	FALSE	FALSE	FALSE	FALSE	FALSE	FALSE	FALSE	FALSE	FALSE	FALSE	FALSE	FALSE	FALSE	FALSE	FALSE	FALSE	FALSE	FALSE	FALSE	FALSE	FALSE	FALSE	FALSE	FALSE	FALSE
		df86736e-ca5d-4bda-b944-0294061e048a	hausserlab	FALSE	FALSE	FALSE	FALSE	FALSE	FALSE	FALSE	FALSE	FALSE	FALSE	FALSE	FALSE	FALSE	FALSE	FALSE	FALSE	FALSE	FALSE	FALSE	FALSE	FALSE	FALSE	FALSE	FALSE	FALSE	FALSE	FALSE	FALSE	FALSE	FALSE	FALSE	FALSE	FALSE	FALSE	FALSE	FALSE	FALSE	FALSE	FALSE	FALSE	FALSE	FALSE	FALSE	FALSE	FALSE	FALSE
	Poor ephys (Artefacts)	8413c5c6-b42b-4ec6-b751-881a54413628	zadorlab	FALSE	FALSE	FALSE	FALSE	FALSE	TRUE	FALSE	FALSE	TRUE	TRUE	TRUE	TRUE	TRUE	TRUE	TRUE	FALSE	FALSE	FALSE	FALSE	FALSE	FALSE	FALSE	FALSE	FALSE	FALSE	FALSE	FALSE	FALSE	FALSE	FALSE	FALSE	FALSE	FALSE	FALSE	FALSE	FALSE	FALSE	FALSE	FALSE	FALSE	FALSE	FALSE	FALSE	FALSE	FALSE	FALSE
		ef03e569-2b50-4534-89f4-fb1e56e81461	wittenlab	FALSE	FALSE	FALSE	FALSE	FALSE	FALSE	FALSE	FALSE	TRUE	TRUE	TRUE	TRUE	TRUE	TRUE	TRUE	FALSE	FALSE	FALSE	FALSE	FALSE	FALSE	FALSE	FALSE	FALSE	FALSE	FALSE	FALSE	FALSE	FALSE	FALSE	FALSE	FALSE	FALSE	FALSE	FALSE	FALSE	FALSE	FALSE	FALSE	FALSE	FALSE	FALSE	FALSE	FALSE	FALSE	FALSE
	Poor ephys (Epilepsy)	5246af08-0730-40f7-83de-29b5d62b9b6d	angelakilab	FALSE	FALSE	FALSE	FALSE	FALSE	TRUE	FALSE	FALSE	TRUE	TRUE	TRUE	TRUE	TRUE	TRUE	TRUE	FALSE	FALSE	FALSE	FALSE	FALSE	FALSE	FALSE	FALSE	FALSE	FALSE	FALSE	FALSE	FALSE	FALSE	FALSE	FALSE	FALSE	FALSE	FALSE	FALSE	FALSE	FALSE	FALSE	FALSE	FALSE	FALSE	FALSE	FALSE	FALSE	FALSE	FALSE
TOTAL N PIDS USED IN ANALYSIS:			121	89	1	77	12	1	3	77	77	101	88	98	99	88	98	99	73	73	77	72	89	73	73	1	1	43	53	44	28	39	73	73	73	73	73	73	73	50	49	71	64	34	73	73	69	32	32
[truncated: 4 more columns]

## Sheet: All numbers (Figures)
	N institutes	N sessions	N mice	N cells
Fig1 d	10	73	72	NA
Fig1 e	1	1	1	NA
Fig1 f Fig1supp4 a	11	78	77	122885
Fig1supp2	5	5	5	NA
Fig1supp3 a	11	73	72	9296
Fig1supp3 b	11	78	77	18247
Fig1supp3 c	10	60	59	20629
Fig2 c	11	105	105	NA
Fig2 d, g	9	88	88	NA
Fig2 e, h	10	98	98	NA
Fig2 f, i Fig2supp1	10	99	99	NA
Fig3 b-c Fig3supp2 a	10	72	72	NA
Fig3 d-e Fig3supp4 (VISa/am)	9	43	42	NA
Fig3 d-e Fig3supp4 (CA1)	10	66	65	NA
Fig3 d-e Fig3supp4 (DG)	7	53	52	NA
Fig3 d-e Fig3supp4 (LP)	7	44	43	NA
Fig3 d-e Fig3supp4 (PO)	5	25	25	NA
Fig3supp1 a, b	11	87	87	NA
Fig4 a	1	1	1	1
Fig4 b	1	1	1	9
Fig4 c, e, h (LP) Fig4supp1 a-e (LP), Fig4Supp2 a (LP)	8	43	42	1321
Fig4 d, e, h (VISa/am) Fig4supp1 a-e (VISa/a,), Fig4Supp2 a (VISa/am)	9	39	38	842
Fig4 d, e, h (CA1), f, g Fig4supp1 a-e (CA1), Fig4Supp2 a (CA1)	10	53	53	505
Fig4 d, e, h (DG) Fig4supp1 a-e (DG), Fig4Supp2 a (DG)	7	44	43	387
Fig4 d, e, h (PO) Fig4supp1 a-e (PO), Fig4Supp2 a (PO)	6	28	28	1345
Fig4supp2 b, c	10	73	72	4400
Fig5 a	2	2	2	2
Fig5 b - i	10	73	72	3084
Fig5supp1 a (VISa/am)	9	39	38	606
Fig5supp1 b (CA1)	10	53	53	386
Fig5supp1 c (DG)	7	44	43	264
Fig5supp1 d (LP)	8	43	42	890
Fig5supp1 e (PO)	6	28	28	938
Fig6 a-d (LP) Fig6supp4 d (LP) Fig6supp5 d (LP)	9	50	49	1337
Fig6supp1 a-d (VISa/am) Fig6supp4 a (VISa/am) Fig6supp5 a (VISa/am)	10	49	48	877
Fig6supp2 a-d (CA1) Fig6supp4 b (CA1) Fig6supp5 b (CA1)	10	71	70	548
Fig6supp3 a-b (DG) Fig6supp4 c (DG) Fig6supp5 c (DG)	9	64	63	448
Fig6supp3 c-d (PO) Fig6supp4 e (PO) Fig6supp5 e (PO)	9	34	34	1529
Fig7 a-b	10	69	68	3860
Fig7 c (VISa/am)	10	47	46	546
Fig7 c (CA1)	10	66	65	368
Fig7 c (DG)	9	61	60	350
Fig7 c (LP)	9	49	48	1193
Fig7 c (PO)	9	34	34	1403
Fig8 b-c	1	1	1	1
Fig8 d-e Fig8supp1 a-c Fig8supp2 a-b Fig8supp3 a-b Fig8supp4 a	7	32	32	1133
Fig9 a-b	10	60	59	3954

## Sheet: Potential recordings
													TOTAL:	89	1	0	1	6	82
Viz	Probe identifier (PID)	Session identifier (EID)	date	probe	lab	subject	institute	lab_number	age_at_recording	n_sess_before_recording	yield_ch	rms_ap_p90	lfp_derivative	n_trials	low_yield	high_ap_noise	high_lfp_noise	low_trials	include
https://viz.internationalbrainlab.org/app?pid=0b8ea3ec-e75b-41a1-9442-64f5fbc11a5a	0b8ea3ec-e75b-41a1-9442-64f5fbc11a5a	a4a74102-2af5-45dc-9e41-ef7f5aed88be	2021-06-01	probe00	mainenlab	ZFM-02368	CCU	Lab 2	163	54	0.538889	19.6967	0.210342	408	FALSE	FALSE	FALSE	FALSE	TRUE
https://viz.internationalbrainlab.org/app?pid=6e1379e8-3af0-4fc5-8ba8-37d3bb02226b	6e1379e8-3af0-4fc5-8ba8-37d3bb02226b	754b74d5-7a06-4004-ae0c-72a10b6ed2e6	2020-09-21	probe00	angelakilab	NYU-29	NYU	Lab 4	125	43	0.427778	15.4613	0.196915	1028	FALSE	FALSE	FALSE	FALSE	TRUE
https://viz.internationalbrainlab.org/app?pid=730770d6-617a-4ada-95db-a48521befda5	730770d6-617a-4ada-95db-a48521befda5	6899a67d-2e53-4215-a52a-c7021b5da5d4	2023-08-29	probe00	churchlandlab_ucla	MFD_06	UCLA	Lab 10	182	64	0.358824	0	0.179562	402	FALSE	FALSE	FALSE	FALSE	TRUE
https://viz.internationalbrainlab.org/app?pid=84bb830f-b9ff-4e6b-9296-f458fb41d160	84bb830f-b9ff-4e6b-9296-f458fb41d160	c7248e09-8c0d-40f2-9eb4-700a8973d8c8	2020-08-05	probe00	mainenlab	ZM_3001	CCU	Lab 2	269	42	0.740331	26.2441	0.204525	780	FALSE	FALSE	FALSE	FALSE	TRUE
https://viz.internationalbrainlab.org/app?pid=143dd7cf-6a47-47a1-906d-927ad7fe9117	143dd7cf-6a47-47a1-906d-927ad7fe9117	3638d102-e8b6-4230-8742-e548cd87a949	2020-12-07	probe01	mrsicflogellab	SWC_058	SWC	Lab 6	132	35	0.20904	13.5737	0.205235	695	FALSE	FALSE	FALSE	FALSE	TRUE
https://viz.internationalbrainlab.org/app?pid=19baa84c-22a5-4589-9cbd-c23f111c054c	19baa84c-22a5-4589-9cbd-c23f111c054c	862ade13-53cd-4221-a3fa-dda8643641f2	2020-07-15	probe01	hoferlab	SWC_042	SWC	Lab 6	217	47	0.118785	18.782	0.312656	595	FALSE	FALSE	FALSE	FALSE	TRUE
https://viz.internationalbrainlab.org/app?pid=a3d13b05-bf4d-427a-a2d5-2fe050d603ec	a3d13b05-bf4d-427a-a2d5-2fe050d603ec	03cf52f6-fba6-4743-a42e-dd1ac3072343	2020-03-22	probe00	zadorlab	CSH_ZAD_011	CSHL (Z)	Lab 8	187	56	0.155063	0	0.212568	415	FALSE	FALSE	FALSE	FALSE	TRUE
https://viz.internationalbrainlab.org/app?pid=f68d9f26-ac40-4c67-9cbf-9ad1851292f7	f68d9f26-ac40-4c67-9cbf-9ad1851292f7	687017d4-c9fc-458f-a7d5-0979fe1a7470	2022-07-12	probe00	churchlandlab_ucla	UCLA052	UCLA	Lab 10	210	56	0.235632	14.8717	0.199417	436	FALSE	FALSE	FALSE	FALSE	TRUE
https://viz.internationalbrainlab.org/app?pid=bf96f6d6-4726-4cfa-804a-bca8f9262721	bf96f6d6-4726-4cfa-804a-bca8f9262721	f140a2ec-fd49-4814-994a-fe3476f14e66	2021-06-21	probe00	angelakilab	NYU-47	NYU	Lab 4	139	46	0.15407	0	0.170404	403	FALSE	FALSE	FALSE	FALSE	TRUE
https://viz.internationalbrainlab.org/app?pid=8d59da25-3a9c-44be-8b1a-e27cdd39ca34	8d59da25-3a9c-44be-8b1a-e27cdd39ca34	4b00df29-3769-43be-bb40-128b1cba6d35	2020-02-21	probe00	churchlandlab	CSHL052	CSHL (C)	Lab 3	192	73	0.17378	14.4553	0.241869	812	FALSE	FALSE	FALSE	FALSE	TRUE
https://viz.internationalbrainlab.org/app?pid=70da415f-444d-4148-ade7-a1f58a16fcf8	70da415f-444d-4148-ade7-a1f58a16fcf8	781b35fd-e1f0-4d14-b2bb-95b7263082bb	2020-12-09	probe01	cortexlab	KS044	UCL	Lab 1	154	60	0.254144	15.9229	0.191967	471	FALSE	FALSE	FALSE	FALSE	TRUE
https://viz.internationalbrainlab.org/app?pid=7cbecb3f-6a8a-48e5-a3be-8f7a762b5a04	7cbecb3f-6a8a-48e5-a3be-8f7a762b5a04	71e55bfe-5a3a-4cba-bdc7-f085140d798e	2020-08-18	probe00	angelakilab	NYU-26	NYU	Lab 4	224	83	0.308824	0	0.205244	1146	FALSE	FALSE	FALSE	FALSE	TRUE
https://viz.internationalbrainlab.org/app?pid=8ca1a850-26ef-42be-8b28-c2e2d12f06d6	8ca1a850-26ef-42be-8b28-c2e2d12f06d6	15763234-d21e-491f-a01b-1238eb96d389	2020-09-04	probe00	zadorlab	CSH_ZAD_026	CSHL (Z)	Lab 8	157	45	0.39011	7.75805	0.144972	894	FALSE	FALSE	FALSE	FALSE	TRUE
https://viz.internationalbrainlab.org/app?pid=f93bfce4-e814-4ae3-9cdf-59f4dcdedf51	f93bfce4-e814-4ae3-9cdf-59f4dcdedf51	7af49c00-63dd-4fed-b2e0-1b3bd945b20b	2021-01-25	probe00	angelakilab	NYU-37	NYU	Lab 4	147	48	0.322404	0	0.271492	414	FALSE	FALSE	FALSE	FALSE	TRUE
https://viz.internationalbrainlab.org/app?pid=63517fd4-ece1-49eb-9259-371dc30b1dd6	63517fd4-ece1-49eb-9259-371dc30b1dd6	4a45c8ba-db6f-4f11-9403-56e06a33dfa4	2020-09-29	probe00	danlab	DY_020	Berkeley	Lab 7	139	44	0.526012	18.2077	0.216694	401	FALSE	FALSE	FALSE	FALSE	TRUE
https://viz.internationalbrainlab.org/app?pid=80f6ffdd-f692-450f-ab19-cd6d45bfd73e	80f6ffdd-f692-450f-ab19-cd6d45bfd73e	e2b845a1-e313-4a08-bc61-a5f662ed295e	2022-03-09	probe00	churchlandlab_ucla	UCLA036	UCLA	Lab 10	224	59	0.358757	14.5205	0.214466	476	FALSE	FALSE	FALSE	FALSE	TRUE
https://viz.internationalbrainlab.org/app?pid=e49f221d-399d-4297-bb7d-2d23cc0e4acc	e49f221d-399d-4297-bb7d-2d23cc0e4acc	c7bf2d49-4937-4597-b307-9f39cb1c7b16	2021-11-22	probe00	cortexlab	KS074	UCL	Lab 1	188	59	0.266854	10.6232	0.212431	587	FALSE	FALSE	FALSE	FALSE	TRUE
https://viz.internationalbrainlab.org/app?pid=8b7c808f-763b-44c8-b273-63c6afbc6aae	8b7c808f-763b-44c8-b273-63c6afbc6aae	41872d7f-75cb-4445-bb1a-132b354c44f0	2020-07-29	probe01	mrsicflogellab	SWC_038	SWC	Lab 6	231	66	0.153409	17.7109	0.237343	512	FALSE	FALSE	FALSE	FALSE	TRUE
https://viz.internationalbrainlab.org/app?pid=a8a59fc3-a658-4db4-b5e8-09f1e4df03fd	a8a59fc3-a658-4db4-b5e8-09f1e4df03fd	5ae68c54-2897-4d3a-8120-426150704385	2023-09-07	probe00	churchlandlab_ucla	MFD_08	UCLA	Lab 10	191	64	0.274286	0	0.202187	740	FALSE	FALSE	FALSE	FALSE	TRUE
https://viz.internationalbrainlab.org/app?pid=e42e948c-3154-45cb-bf52-408b7cda0f2f	e42e948c-3154-45cb-bf52-408b7cda0f2f	d57df551-6dcb-4242-9c72-b806cff5613a	2021-08-02	probe00	churchlandlab_ucla	UCLA005	UCLA	Lab 10	181	68	0.145455	0	0.586348	772	FALSE	FALSE	FALSE	FALSE	TRUE
https://viz.internationalbrainlab.org/app?pid=7a620688-66cb-44d3-b79b-ccac1c8ba23e	7a620688-66cb-44d3-b79b-ccac1c8ba23e	15b69921-d471-4ded-8814-2adad954bcd8	2023-08-31	probe00	churchlandlab_ucla	MFD_07	UCLA	Lab 10	184	62	0.251323	12.4571	0.162949	825	FALSE	FALSE	FALSE	FALSE	TRUE
https://viz.internationalbrainlab.org/app?pid=02cc03e4-8015-4050-bb42-6c832091febb	02cc03e4-8015-4050-bb42-6c832091febb	2bdf206a-820f-402f-920a-9e86cd5388a4	2022-02-02	probe00	churchlandlab_ucla	UCLA037	UCLA	Lab 10	189	33	0.254237	13.446	0.225441	580	FALSE	FALSE	FALSE	FALSE	TRUE
https://viz.internationalbrainlab.org/app?pid=a12c8ae8-d5ad-4d15-b805-436ad23e5ad1	a12c8ae8-d5ad-4d15-b805-436ad23e5ad1	d9f0c293-df4c-410a-846d-842e47c6b502	2020-12-07	probe01	wittenlab	ibl_witten_25	Princeton	Lab 5	181	49	0.41573	12.6001	0.292435	401	FALSE	FALSE	FALSE	FALSE	TRUE
https://viz.internationalbrainlab.org/app?pid=523f8301-4f56-4faf-ab33-a9ff11331118	523f8301-4f56-4faf-ab33-a9ff11331118	88224abb-5746-431f-9c17-17d7ef806e6a	2021-06-01	probe00	mainenlab	ZFM-02372	CCU	Lab 2	163	57	0.33432	12.5969	0.214039	452	FALSE	FALSE	FALSE	FALSE	TRUE
https://viz.internationalbrainlab.org/app?pid=0aafb6f1-6c10-4886-8f03-543988e02d9e	0aafb6f1-6c10-4886-8f03-543988e02d9e	3e6a97d3-3991-49e2-b346-6948cb4580fb	2022-05-08	probe00	steinmetzlab	NR_0020	UW	Lab 9	235	66	0.188623	11.3451	0.136806	525	FALSE	FALSE	FALSE	FALSE	TRUE
https://viz.internationalbrainlab.org/app?pid=f9d8aacd-b2a0-49f2-bd71-c2f5aadcfdd1	f9d8aacd-b2a0-49f2-bd71-c2f5aadcfdd1	8a3a0197-b40a-449f-be55-c00b23253bbf	2022-01-25	probe00	churchlandlab_ucla	UCLA034	UCLA	Lab 10	181	33	0.345714	0	0.210983	417	FALSE	FALSE	FALSE	FALSE	TRUE
https://viz.internationalbrainlab.org/app?pid=1f5d62cb-814f-4ab2-b6af-7557ea04d56a	1f5d62cb-814f-4ab2-b6af-7557ea04d56a	239dd3c9-35f3-4462-95ee-91b822a22e6b	2022-07-26	probe00	mainenlab	ZFM-04308	CCU	Lab 2	236	91	0.220497	0	0.177216	414	FALSE	FALSE	FALSE	FALSE	TRUE
https://viz.internationalbrainlab.org/app?pid=dab512bd-a02d-4c1f-8dbc-9155a163efc0	dab512bd-a02d-4c1f-8dbc-9155a163efc0	d23a44ef-1402-4ed7-97f5-47e9a7a504d9	2020-09-12	probe00	danlab	DY_016	Berkeley	Lab 7	122	32	0.303468	12.6535	0.229	410	FALSE	FALSE	FALSE	FALSE	TRUE
https://viz.internationalbrainlab.org/app?pid=bbe6ebc1-d32f-42dd-a89c-211226737deb	bbe6ebc1-d32f-42dd-a89c-211226737deb	1b715600-0cbc-442c-bd00-5b0ac2865de1	2022-01-31	probe01	cortexlab	KS084	UCL	Lab 1	167	44	0.222222	12.3709	0.168358	437	FALSE	FALSE	FALSE	FALSE	TRUE
https://viz.internationalbrainlab.org/app?pid=9657af01-50bd-4120-8303-416ad9e24a51	9657af01-50bd-4120-8303-416ad9e24a51	7f6b86f9-879a-4ea2-8531-294a221af5d0	2020-08-14	probe00	zadorlab	CSH_ZAD_019	CSHL (Z)	Lab 8	276	86	0.133929	16.2966	0.140593	1013	FALSE	FALSE	FALSE	FALSE	TRUE
https://viz.internationalbrainlab.org/app?pid=3fded122-619c-4e65-aadd-d5420978d167	3fded122-619c-4e65-aadd-d5420978d167	6c6b0d06-6039-4525-a74b-58cfaa1d3a60	2022-08-19	probe00	steinmetzlab	NR_0027	UW	Lab 9	169	40	0.179775	11.4317	0.182407	1006	FALSE	FALSE	FALSE	FALSE	TRUE
https://viz.internationalbrainlab.org/app?pid=485b50c8-71e1-4654-9a07-64395c15f5ed	485b50c8-71e1-4654-9a07-64395c15f5ed	9b528ad0-4599-4a55-9148-96cc1d93fb24	2022-04-29	probe00	steinmetzlab	NR_0019	UW	Lab 9	271	67	0.175978	9.27725	0.208426	581	FALSE	FALSE	FALSE	FALSE	TRUE
https://viz.internationalbrainlab.org/app?pid=6d9b6393-6729-4a15-ad08-c6838842a074	6d9b6393-6729-4a15-ad08-c6838842a074	91bac580-76ed-41ab-ac07-89051f8d7f6e	2022-04-14	probe00	churchlandlab_ucla	UCLA044	UCLA	Lab 10	177	68	0.2	0	0.168316	699	FALSE	FALSE	FALSE	FALSE	TRUE
https://viz.internationalbrainlab.org/app?pid=c6e294f7-5421-4697-8618-8ccc9b0269f6	c6e294f7-5421-4697-8618-8ccc9b0269f6	0841d188-8ef2-4f20-9828-76a94d5343a4	2022-08-02	probe00	churchlandlab_ucla	UCLA049	UCLA	Lab 10	231	71	0.147727	9.76303	0.205372	505	FALSE	FALSE	FALSE	FALSE	TRUE
https://viz.internationalbrainlab.org/app?pid=ee3345e6-540d-4cea-9e4a-7f1b2fb9a4e4	ee3345e6-540d-4cea-9e4a-7f1b2fb9a4e4	dc962048-89bb-4e6a-96a9-b062a2be1426	2022-08-16	probe00	churchlandlab_ucla	UCLA048	UCLA	Lab 10	245	80	0.242938	15.0845	0.155571	458	FALSE	FALSE	FALSE	FALSE	TRUE
https://viz.internationalbrainlab.org/app?pid=63a32e5c-f63a-450d-85cb-140947b67eaf	63a32e5c-f63a-450d-85cb-140947b67eaf	c4432264-e1ae-446f-8a07-6280abade813	2020-12-01	probe00	mainenlab	ZFM-01576	CCU	Lab 2	189	66	0.125714	0	0.155785	848	FALSE	FALSE	FALSE	FALSE	TRUE
https://viz.internationalbrainlab.org/app?pid=84fd7fa3-6c2d-4233-b265-46a427d3d68d	84fd7fa3-6c2d-4233-b265-46a427d3d68d	ff96bfe1-d925-4553-94b5-bf8297adf259	2021-01-27	probe01	wittenlab	ibl_witten_26	Princeton	Lab 5	232	87	0.241667	0	0.213387	426	FALSE	FALSE	FALSE	FALSE	TRUE
https://viz.internationalbrainlab.org/app?pid=49c2ea3d-2b50-4e8a-b124-9e190960784e	49c2ea3d-2b50-4e8a-b124-9e190960784e	642c97ea-fe89-4ec9-8629-5e492ea4019d	2023-07-12	probe00	steinmetzlab	NR_0031	UW	Lab 9			0.355615	0	0.516104	489	FALSE	FALSE	FALSE	FALSE	TRUE
https://viz.internationalbrainlab.org/app?pid=8abf098f-d4f6-4957-9c0a-f53685db74cc	8abf098f-d4f6-4957-9c0a-f53685db74cc	b22f694e-4a34-4142-ab9d-2556c3487086	2021-05-02	probe00	cortexlab	KS055	UCL	Lab 1	159	53	0.217877	13.0251	0.166191	480	FALSE	FALSE	FALSE	FALSE	TRUE
https://viz.internationalbrainlab.org/app?pid=36362f75-96d8-4ed4-a728-5e72284d0995	36362f75-96d8-4ed4-a728-5e72284d0995	d0ea3148-948d-4817-94f8-dcaf2342bbbe	2021-01-19	probe00	mainenlab	ZFM-01936	CCU	Lab 2	149	35	0.375706	12.9096	0.250313	560	FALSE	FALSE	FALSE	FALSE	TRUE
https://viz.internationalbrainlab.org/app?pid=b749446c-18e3-4987-820a-50649ab0f826	b749446c-18e3-4987-820a-50649ab0f826	aad23144-0e52-4eac-80c5-c4ee2decb198	2019-12-10	probe01	cortexlab	KS023	UCL	Lab 1	168	45	0.248603	16.1588	0.183891	641	FALSE	FALSE	FALSE	FALSE	TRUE
https://viz.internationalbrainlab.org/app?pid=17d9710a-f292-4226-b033-687d54b6545a	17d9710a-f292-4226-b033-687d54b6545a	d04feec7-d0b7-4f35-af89-0232dd975bf0	2022-03-19	probe01	cortexlab	KS089	UCL	Lab 1	186	63	0.180791	12.3219	0.169634	402	FALSE	FALSE	FALSE	FALSE	TRUE
https://viz.internationalbrainlab.org/app?pid=c07d13ed-e387-4457-8e33-1d16aed3fd92	c07d13ed-e387-4457-8e33-1d16aed3fd92	824cf03d-4012-4ab1-b499-c83a92c5589e	2021-07-20	probe00	churchlandlab_ucla	UCLA011	UCLA	Lab 10	168	59	0.184659	17.2737	0.769707	764	FALSE	FALSE	FALSE	FALSE	TRUE
https://viz.internationalbrainlab.org/app?pid=bc1602ba-dd6c-4ae4-bcb2-4925e7c8632a	bc1602ba-dd6c-4ae4-bcb2-4925e7c8632a	30c4e2ab-dffc-499d-aae4-e51d6b3218c2	2021-04-29	probe00	mainenlab	ZFM-02370	CCU	Lab 2	130	36	0.544693	17.1695	0.21632	841	FALSE	FALSE	FALSE	FALSE	TRUE
https://viz.internationalbrainlab.org/app?pid=1e176f17-d00f-49bb-87ff-26d237b525f1	1e176f17-d00f-49bb-87ff-26d237b525f1	a8a8af78-16de-4841-ab07-fde4b5281a03	2020-01-22	probe00	angelakilab	NYU-12	NYU	Lab 4	148	46	0.176966	16.7505	0.308363	550	FALSE	FALSE	FALSE	FALSE	TRUE
https://viz.internationalbrainlab.org/app?pid=69f42a9c-095d-4a25-bca8-61a9869871d3	69f42a9c-095d-4a25-bca8-61a9869871d3	dda5fc59-f09a-4256-9fb5-66c67667a466	2020-03-06	probe00	churchlandlab	CSHL059	CSHL (C)	Lab 3	143	38	0.246914	15.1025	0.194359	751	FALSE	FALSE	FALSE	FALSE	TRUE
https://viz.internationalbrainlab.org/app?pid=eeb27b45-5b85-4e5c-b6ff-f639ca5687de	eeb27b45-5b85-4e5c-b6ff-f639ca5687de	f312aaec-3b6f-44b3-86b4-3a0c119c0438	2020-07-07	probe00	churchlandlab	CSHL058	CSHL (C)	Lab 3	266	75	0.395349	14.1718	0.247501	626	FALSE	FALSE	FALSE	FALSE	TRUE
https://viz.internationalbrainlab.org/app?pid=0851db85-2889-4070-ac18-a40e8ebd96ba	0851db85-2889-4070-ac18-a40e8ebd96ba	73918ae1-e4fd-4c18-b132-00cb555b1ad2	2021-01-21	probe01	wittenlab	ibl_witten_27	Princeton	Lab 5	191	69	0.143885	16.1632	0.239645	625	FALSE	FALSE	FALSE	FALSE	TRUE
https://viz.internationalbrainlab.org/app?pid=22212d26-a167-45fb-9963-35ecd003e8a2	22212d26-a167-45fb-9963-35ecd003e8a2	b196a2ad-511b-4e90-ac99-b5a29ad25c22	2022-02-01	probe01	cortexlab	KS084	UCL	Lab 1	168	45	0.194444	12.8652	0.197575	530	FALSE	FALSE	FALSE	FALSE	TRUE
https://viz.internationalbrainlab.org/app?pid=c17772a9-21b5-49df-ab31-3017addea12e	c17772a9-21b5-49df-ab31-3017addea12e	6f09ba7e-e3ce-44b0-932b-c003fb44fb89	2020-09-16	probe01	hoferlab	SWC_043	SWC	Lab 6	280	82	0.367232	12.9661	0.333698	551	FALSE	FALSE	FALSE	FALSE	TRUE
https://viz.internationalbrainlab.org/app?pid=b25799a5-09e8-4656-9c1b-44bc9cbb5279	b25799a5-09e8-4656-9c1b-44bc9cbb5279	d2832a38-27f6-452d-91d6-af72d794136c	2021-06-08	probe00	wittenlab	ibl_witten_29	Princeton	Lab 5	252	91	0.352459	11.0912	0.218578	663	FALSE	FALSE	FALSE	FALSE	TRUE
https://viz.internationalbrainlab.org/app?pid=16799c7a-e395-435d-a4c4-a678007e1550	16799c7a-e395-435d-a4c4-a678007e1550	0a018f12-ee06-4b11-97aa-bbbff5448e9f	2021-05-11	probe00	cortexlab	KS051	UCL	Lab 1	168	63	0.336158	17.3333	0.210623	478	FALSE	FALSE	FALSE	FALSE	TRUE
https://viz.internationalbrainlab.org/app?pid=92033a0c-5a14-471b-b131-d43c72ca5d7a	92033a0c-5a14-471b-b131-d43c72ca5d7a	f115196e-8dfe-4d2a-8af3-8206d93c1729	2022-06-23	probe00	steinmetzlab	NR_0021	UW	Lab 9	223	53	0.172131	13.7439	0.264879	645	FALSE	FALSE	FALSE	FALSE	TRUE
https://viz.internationalbrainlab.org/app?pid=4836a465-c691-4852-a0b1-dcd2b1ce38a1	4836a465-c691-4852-a0b1-dcd2b1ce38a1	caa5dddc-9290-4e27-9f5e-575ba3598614	2023-07-14	probe00	steinmetzlab	NR_0031	UW	Lab 9			0.360465	0	0.172047	404	FALSE	FALSE	FALSE	FALSE	TRUE
https://viz.internationalbrainlab.org/app?pid=f03b61b4-6b13-479d-940f-d1608eb275cc	f03b61b4-6b13-479d-940f-d1608eb275cc	ee40aece-cffd-4edb-a4b6-155f158c666a	2020-01-30	probe00	mainenlab	ZM_2241	CCU	Lab 2	171	46	0.474576	21.3426	0.247852	994	FALSE	FALSE	FALSE	FALSE	TRUE
https://viz.internationalbrainlab.org/app?pid=6fc4d73c-2071-43ec-a756-c6c6d8322c8b	6fc4d73c-2071-43ec-a756-c6c6d8322c8b	dac3a4c1-b666-4de0-87e8-8c514483cacf	2020-11-24	probe01	hoferlab	SWC_060	SWC	Lab 6	119	25	0.200549	12.3488	0.211544	501	FALSE	FALSE	FALSE	FALSE	TRUE
https://viz.internationalbrainlab.org/app?pid=e31b4e39-e350-47a9-aca4-72496d99ff2a	e31b4e39-e350-47a9-aca4-72496d99ff2a	746d1902-fa59-4cab-b0aa-013be36060d5	2020-10-20	probe00	mainenlab	ZFM-01592	CCU	Lab 2	128	27	0.659459	0	0.248844	660	FALSE	FALSE	FALSE	FALSE	TRUE
https://viz.internationalbrainlab.org/app?pid=3d3d5a5e-df26-43ee-80b6-2d72d85668a5	3d3d5a5e-df26-43ee-80b6-2d72d85668a5	0c828385-6dd6-4842-a702-c5075f5f5e81	2022-03-31	probe00	churchlandlab_ucla	UCLA015	UCLA	Lab 10	380	185	0.33237	0	0.156391	610	FALSE	FALSE	FALSE	FALSE	TRUE
https://viz.internationalbrainlab.org/app?pid=f4bd76a6-66c9-41f3-9311-6962315f8fc8	f4bd76a6-66c9-41f3-9311-6962315f8fc8	72cb5550-43b4-4ef0-add5-e4adfdfb5e02	2021-05-19	probe00	mainenlab	ZFM-02369	CCU	Lab 2	150	46	0.344633	20.5632	0.235529	733	FALSE	FALSE	FALSE	FALSE	TRUE
https://viz.internationalbrainlab.org/app?pid=92822789-608f-44a6-ad64-fe549402b2df	92822789-608f-44a6-ad64-fe549402b2df	ca4ecb4c-4b60-4723-9b9e-2c54a6290a53	2023-08-16	probe00	churchlandlab_ucla	MFD_05	UCLA	Lab 10	169	57	0.342105	0	0.176567	620	FALSE	FALSE	FALSE	FALSE	TRUE
https://viz.internationalbrainlab.org/app?pid=b83407f8-8220-46f9-9b90-a4c9f150c572	b83407f8-8220-46f9-9b90-a4c9f150c572	bb099402-fb31-4cfd-824e-1c97530a0875	2021-11-16	probe00	churchlandlab_ucla	UCLA017	UCLA	Lab 10	245	107	0.390323	0	0.237818	665	FALSE	FALSE	FALSE	FALSE	TRUE
https://viz.internationalbrainlab.org/app?pid=e4ce2e94-6fb9-4afe-acbf-6f5a3498602e	e4ce2e94-6fb9-4afe-acbf-6f5a3498602e	6ab9d98c-b1e9-4574-b8fe-b9eec88097e0	2023-06-05	probe00	hausserlab	PL050	UCL (H)	Lab 11	111	36	0.233728	0	0.230379	874	FALSE	FALSE	FALSE	FALSE	TRUE
https://viz.internationalbrainlab.org/app?pid=ce397420-3cd2-4a55-8fd1-5e28321981f4	ce397420-3cd2-4a55-8fd1-5e28321981f4	56b57c38-2699-4091-90a8-aba35103155e	2020-10-05	probe01	mrsicflogellab	SWC_054	SWC	Lab 6	146	50	0.516854	13.7788	0.21109	571	FALSE	FALSE	FALSE	FALSE	TRUE
https://viz.internationalbrainlab.org/app?pid=4b93a168-0f3b-4124-88fa-a57046ca70e1	4b93a168-0f3b-4124-88fa-a57046ca70e1	7cb81727-2097-4b52-b480-c89867b5b34c	2020-10-22	probe01	mrsicflogellab	SWC_052	SWC	Lab 6	163	68	0.137143	0	0.20372	658	FALSE	FALSE	FALSE	FALSE	TRUE
https://viz.internationalbrainlab.org/app?pid=8c732bf2-639d-496c-bf82-464bc9c2d54b	8c732bf2-639d-496c-bf82-464bc9c2d54b	ebce500b-c530-47de-8cb1-963c552703ea	2023-10-19	probe00	churchlandlab_ucla	MFD_09	UCLA	Lab 10	233	65	0.71547	0	0.170883	569	FALSE	FALSE	FALSE	FALSE	TRUE
https://viz.internationalbrainlab.org/app?pid=94e948c1-f7be-4868-893a-f7cd2df3313e	94e948c1-f7be-4868-893a-f7cd2df3313e	03d9a098-07bf-4765-88b7-85f8d8f620cc	2021-08-18	probe00	churchlandlab_ucla	UCLA014	UCLA	Lab 10	155	52	0.179775	0	0.540443	581	FALSE	FALSE	FALSE	FALSE	TRUE
https://viz.internationalbrainlab.org/app?pid=6b6af675-e1ef-43a6-b408-95cfc71fe2cc	6b6af675-e1ef-43a6-b408-95cfc71fe2cc	3f859b5c-e73a-4044-b49e-34bb81e96715	2022-06-17	probe01	cortexlab	KS094	UCL	Lab 1	136	41	0.395028	13.5949	0.218895	490	FALSE	FALSE	FALSE	FALSE	TRUE
https://viz.internationalbrainlab.org/app?pid=7d999a68-0215-4e45-8e6c-879c6ca2b771	7d999a68-0215-4e45-8e6c-879c6ca2b771	0802ced5-33a3-405e-8336-b65ebc5cb07c	2021-06-23	probe00	mainenlab	ZFM-02373	CCU	Lab 2	185	70	0.288136	17.9194	0.135612	424	FALSE	FALSE	FALSE	FALSE	TRUE
https://viz.internationalbrainlab.org/app?pid=27bac116-ea57-4512-ad35-714a62d259cd	27bac116-ea57-4512-ad35-714a62d259cd	111c1762-7908-47e0-9f40-2f2ee55b6505	2022-02-15	probe00	churchlandlab_ucla	UCLA033	UCLA	Lab 10	224	61	0.332353	0	0.228672	724	FALSE	FALSE	FALSE	FALSE	TRUE
https://viz.internationalbrainlab.org/app?pid=febb430e-2d50-4f83-87a0-b5ffbb9a4943	febb430e-2d50-4f83-87a0-b5ffbb9a4943	db4df448-e449-4a6f-a0e7-288711e7a75a	2020-02-27	probe00	danlab	DY_009	Berkeley	Lab 7	193	71	0.311111	0	0.241879	402	FALSE	FALSE	FALSE	FALSE	TRUE
https://viz.internationalbrainlab.org/app?pid=1a60a6e1-da99-4d4e-a734-39b1d4544fad	1a60a6e1-da99-4d4e-a734-39b1d4544fad	51e53aff-1d5d-4182-a684-aba783d50ae5	2021-07-19	probe00	angelakilab	NYU-45	NYU	Lab 4	167	62	0.331522	11.9697	0.173702	505	FALSE	FALSE	FALSE	FALSE	TRUE
https://viz.internationalbrainlab.org/app?pid=478de1ce-d7e7-4221-9365-2abdc6e88fb6	478de1ce-d7e7-4221-9365-2abdc6e88fb6	5c0c560e-9e1f-45e9-b66e-e4ee7855be84	2023-03-07	probe00	steinmetzlab	NR_0028	UW	Lab 9	272	44	0.328402	0	0.192312	1100	FALSE	FALSE	FALSE	FALSE	TRUE
https://viz.internationalbrainlab.org/app?pid=57656bee-e32e-4848-b924-0f6f18cfdfb1	57656bee-e32e-4848-b924-0f6f18cfdfb1	a66f1593-dafd-4982-9b66-f9554b6c86b5	2020-05-23	probe00	zadorlab	CSH_ZAD_022	CSHL (Z)	Lab 8	193	32	0.138728	15.5511	0.151949	657	FALSE	FALSE	FALSE	FALSE	TRUE
https://viz.internationalbrainlab.org/app?pid=c4f6665f-8be5-476b-a6e8-d81eeae9279d	c4f6665f-8be5-476b-a6e8-d81eeae9279d	e535fb62-e245-4a48-b119-88ce62a6fe67	2020-03-12	probe00	danlab	DY_013	Berkeley	Lab 7	141	34	0.132184	0	0.192894	434	FALSE	FALSE	FALSE	FALSE	TRUE
https://viz.internationalbrainlab.org/app?pid=ad714133-1e03-4d3a-8427-33fc483daf1a	ad714133-1e03-4d3a-8427-33fc483daf1a	8928f98a-b411-497e-aa4b-aa752434686d	2022-06-17	probe01	cortexlab	KS096	UCL	Lab 1	136	35	0.428177	14.9658	0.159372	663	FALSE	FALSE	FALSE	FALSE	TRUE
https://viz.internationalbrainlab.org/app?pid=f2a098e7-a67e-4125-92d8-36fc6b606c45	f2a098e7-a67e-4125-92d8-36fc6b606c45	e45481fa-be22-4365-972c-e7404ed8ab5a	2022-03-15	probe01	cortexlab	KS086	UCL	Lab 1	210	75	0.105714	15.1356	0.214252	525	FALSE	FALSE	FALSE	FALSE	TRUE
https://viz.internationalbrainlab.org/app?pid=f26a6ab1-7e37-4f8d-bb50-295c056e1062	f26a6ab1-7e37-4f8d-bb50-295c056e1062	54238fd6-d2d0-4408-b1a9-d19d24fd29ce	2020-10-15	probe00	danlab	DY_018	Berkeley	Lab 7	155	57	0.277778	15.0768	0.231319	623	FALSE	FALSE	FALSE	FALSE	TRUE
https://viz.internationalbrainlab.org/app?pid=f2ee886d-5b9c-4d06-a9be-ee7ae8381114	f2ee886d-5b9c-4d06-a9be-ee7ae8381114	ecb5520d-1358-434c-95ec-93687ecd1396	2020-02-05	probe00	churchlandlab	CSHL051	CSHL (C)	Lab 3	176	57	0.134615	13.548	0.147533	510	FALSE	FALSE	FALSE	FALSE	TRUE
https://viz.internationalbrainlab.org/app?pid=31f3e083-a324-4b88-b0a4-7788ec37b191	31f3e083-a324-4b88-b0a4-7788ec37b191	61e11a11-ab65-48fb-ae08-3cb80662e5d6	2020-08-10	probe00	angelakilab	NYU-21	NYU	Lab 4	223	81	0.213514	14.2678	0.236225	891	FALSE	FALSE	FALSE	FALSE	TRUE
https://viz.internationalbrainlab.org/app?pid=f86e9571-63ff-4116-9c40-aa44d57d2da9	f86e9571-63ff-4116-9c40-aa44d57d2da9	4b7fbad4-f6de-43b4-9b15-c7c7ef44db4b	2020-01-08	probe00	churchlandlab	CSHL049	CSHL (C)	Lab 3	155	44	0.139665	18.711	0.315094	842	FALSE	FALSE	FALSE	FALSE	TRUE
https://viz.internationalbrainlab.org/app?pid=d004f105-9886-4b83-a59a-f9173131a383	d004f105-9886-4b83-a59a-f9173131a383	3bcb81b4-d9ca-4fc9-a1cd-353a966239ca	2023-01-19	probe00	steinmetzlab	NR_0024	UW	Lab 9	442	124	0.176136	11.5802	0.178947	664	FALSE	FALSE	FALSE	FALSE	TRUE
https://viz.internationalbrainlab.org/app?pid=9117969a-3f0d-478b-ad75-98263e3bfacf	9117969a-3f0d-478b-ad75-98263e3bfacf	b03fbc44-3d8e-4a6c-8a50-5ea3498568e0	2020-01-27	probe00	danlab	DY_010	Berkeley	Lab 7	162	50	0.418539	13.7385	0.23616	402	FALSE	FALSE	FALSE	FALSE	TRUE
https://viz.internationalbrainlab.org/app?pid=7f3dddf8-637f-47bb-a7b7-e303277b2107	7f3dddf8-637f-47bb-a7b7-e303277b2107	57fd2325-67f4-4d45-9907-29e77d3043d7	2020-02-12	probe00	churchlandlab	CSHL054	CSHL (C)	Lab 3	183	62	0.1375	0	0.228039	171	FALSE	FALSE	FALSE	TRUE	FALSE
https://viz.internationalbrainlab.org/app?pid=b2746c16-7152-45a3-a7f0-477985638638	b2746c16-7152-45a3-a7f0-477985638638	614e1937-4b24-4ad3-9055-c8253d089919	2019-12-10	probe01	hoferlab	SWC_014	SWC	Lab 6	189	56	0.390173	16.0766	0.20182	195	FALSE	FALSE	FALSE	TRUE	FALSE
https://viz.internationalbrainlab.org/app?pid=1f3d3fcb-f188-47a2-87e5-ac1db6cf393a	1f3d3fcb-f188-47a2-87e5-ac1db6cf393a	0cad7ea8-8e6c-4ad1-a5c5-53fbb2df1a63	2020-12-09	probe01	cortexlab	KS045	UCL	Lab 1	154	55	0.126437	0	0.208366	314	FALSE	FALSE	FALSE	TRUE	FALSE
https://viz.internationalbrainlab.org/app?pid=ae252f7b-0224-4925-8174-7b25c2385bb7	ae252f7b-0224-4925-8174-7b25c2385bb7	572a95d1-39ca-42e1-8424-5c9ffcb2df87	2020-02-07	probe01	cortexlab	KS020	UCL	Lab 1	227	75	0.457143	14.1613	0.199795	339	FALSE	FALSE	FALSE	TRUE	FALSE
https://viz.internationalbrainlab.org/app?pid=11a5a93e-58a9-4ed0-995e-52279ec16b98	11a5a93e-58a9-4ed0-995e-52279ec16b98	ebe090af-5922-4fcd-8fc6-17b8ba7bad6d	2019-12-03	probe01	wittenlab	ibl_witten_13	Princeton	Lab 5	224	74	0.463277	20.2475	2.1306	850	FALSE	FALSE	TRUE	FALSE	FALSE
https://viz.internationalbrainlab.org/app?pid=ca5764ea-a57e-49de-8156-84da18ad439f	ca5764ea-a57e-49de-8156-84da18ad439f	e9b57a5a-b06d-476d-ad20-7ec42a16f5f5	2020-01-14	probe00	zadorlab	CSH_ZAD_001	CSHL (Z)	Lab 8	273	61	0.379518	16.0961	0.398621	310	FALSE	FALSE	FALSE	TRUE	FALSE
https://viz.internationalbrainlab.org/app?pid=dc50c3de-5d84-4408-9725-22ae55b93522	dc50c3de-5d84-4408-9725-22ae55b93522	38d95489-2e82-412a-8c1a-c5377b5f1555	2020-02-13	probe01	mrsicflogellab	SWC_023	SWC	Lab 6	240	66	0.0289017	15.9097	0.728338	50	TRUE	FALSE	FALSE	TRUE	FALSE

## Sheet: Manually failed recordings
TOTAL:	32	1	10	2	1
Probe identifier (PID)	Critical reason	Drift	Noisy channels	Artefacts	Epileptiform act.
341ef9bb-25f9-4eeb-8f1d-bdd054b22ba8	Poor Ephys	TRUE	FALSE	FALSE	FALSE
0132a739-be48-494a-a722-c4299b266d29	Poor Ephys	FALSE	TRUE	FALSE	FALSE
1b1028b4-17fd-4235-97b4-a9bdccdd51af	Poor Ephys	FALSE	TRUE	FALSE	FALSE
44fc10b1-ec82-4f88-afbf-10a6f8a1b5d8	Poor Ephys	FALSE	TRUE	FALSE	FALSE
ef3d059a-59d5-4870-b355-563a8d7cfd2d	Poor Ephys	FALSE	TRUE	FALSE	FALSE
d7361c6f-6751-4b5f-91c2-fdd61f988aa4	Poor Ephys	FALSE	TRUE	FALSE	FALSE
f8d0ecdc-b7bd-44cc-b887-3d544e24e561	Poor Ephys	FALSE	TRUE	FALSE	FALSE
72f89097-4836-4b67-a47a-edb3285a6e83	Poor Ephys	FALSE	TRUE	FALSE	FALSE
8185f1e9-cfe0-4fd6-8d7e-446a8051c588	Poor Ephys	FALSE	TRUE	FALSE	FALSE
64775a68-73ed-42a2-b7c7-371625a6d728	Poor Ephys	FALSE	TRUE	FALSE	FALSE
df86736e-ca5d-4bda-b944-0294061e048a	Poor Ephys	FALSE	TRUE	FALSE	FALSE
8413c5c6-b42b-4ec6-b751-881a54413628	Poor Ephys	FALSE	FALSE	TRUE	FALSE
ef03e569-2b50-4534-89f4-fb1e56e81461	Poor Ephys	FALSE	FALSE	TRUE	FALSE
5246af08-0730-40f7-83de-29b5d62b9b6d	Poor Ephys	FALSE	FALSE	FALSE	TRUE
3443eceb-50b3-450e-b7c1-fc465a3bc84f	No usable histology
553f8d56-b6e7-46bd-a146-ac43b8ec6de7	No usable histology
6bfa4a99-bdfa-4e44-aa01-9c7eac7e253d	No usable histology
82a42cdf-3140-427b-8ad0-0d504716c871	No usable histology
dc6eea9b-a8fb-4151-b298-718f321e6968	No usable histology
81347b01-b2a2-4985-b1b1-436fb83049d1	No usable histology
978b4073-e3b0-440a-a336-cd26e3bae8ea	No usable histology
c5130b6f-f584-4514-8be4-22bcde848a60	No usable histology
143cff36-30b4-4b25-9d26-5a2dbe6f6fc2	Hardware failure
79bcfe47-33ed-4432-a598-66006b4cde56	Hardware failure
80624507-4be6-4689-92df-0e2c26c3faf3	Hardware failure
e7abb87f-4324-4c89-8a46-97ed4b40577e	Hardware failure
f936a701-5f8a-4aa1-b7a9-9f8b5b69bc7c	Hardware failure
fc626c12-bd1e-45c3-9434-4a7a8c81d7c0	Hardware failure
d8ff1218-75e1-4962-b920-98c40b9dea1a	Hardware failure
41a3b948-13f4-4be7-90b9-150705d39005	Hardware failure
99b8eb91-393d-4ed1-913e-ce5ee2e31bc3	Hardware failure
9e44ddb5-7c7c-48f1-954a-6cec2ad26088	Hardware failure
